# Supplementary material for: Metabolomic and Lipidomic Analysis of the Colorectal Adenocarcinoma Cell Line HT29 in Hypoxia and Reoxygenation
Source: MDPI journal article supplement (doi:10.3390/metabo13070875), 2023-07-23
Supplement: s1 [file s1]

## Supplementary material

**Figure S1.** Heatmap of standardized metabolite concentrations of HT29 in normoxia, hypoxia, RO-30m and RO-1h. The subset of metabolites with  $p < 0.05$  (ANOVA, before multiple testing correction) are displayed. Star annotations indicate statistical significance after multiple testing correction, \*  $p < 0.05$ .

**Figure S2.** Heatmap of standardized concentrations of significant lipid species ( $p < 0.05$  before multiple testing correction). Only the subset of lipids with  $p < 0.05$  (ANOVA, before multiple testing correction) are displayed.

**Figure S3.** Intracellular and extracellular concentrations of creatine, alanine, and creatine phosphate in hypoxic, normoxic and reoxygenated HT29 up to 24h. Star annotations indicate statistical significance after multiple testing correction, \*  $p < 0.05$ , \*\*  $p < 0.01$ , \*\*\*  $p < 0.001$ .

**Figure S4.** Saturation Index (SI) for CE, FFA, LPC, LPE and PE; for SI definition see Methods. Star annotations indicate statistical significance after multiple testing correction, \*  $p < 0.05$ , \*\*  $p < 0.01$ .

**Figure S5.** Heatmap of standardized species/total class ratios for quantified sphingolipids.

**Figure S6.**  $\text{NAD}^+/\text{NADH}$  ratio as well the intracellular concentrations of  $\text{NAD}^+$  and NADPH in hypoxic, normoxic and reoxygenated HT29 up to 24h.
