# Supplementary material for: Metabolomic and Lipidomic Analysis of the Colorectal Adenocarcinoma Cell Line HT29 in Hypoxia and Reoxygenation
Source: Metabolites. 2023 Jul 23;13(7):875. doi: 10.3390/metabo13070875 (PMC10384744; doi:10.3390/metabo13070875)
Supplement: Supplementary file 1 [file metabolites-13-00875-s001.zip]

Archive with 8 entries (8 files):
- Figure S1.pdf
- Figure S2.pdf
- Figure S3.pdf
- Figure S4.pdf
- Figure S5.pdf
- Figure S6.pdf
- Supplementary material.pdf
- Supplementary_Datasets.xlsx
