# Supplementary material for: Metabolomic and Lipidomic Analysis of the Colorectal Adenocarcinoma Cell Line HT29 in Hypoxia and Reoxygenation
Source: Metabolites. 2023 Jul 23;13(7):875. doi: 10.3390/metabo13070875 (PMC10384744; doi:10.3390/metabo13070875)
Supplement: Supplementary file 1 [file metabolites-13-00875-s001.zip › Supplementary_Datasets.xlsx]

## Sheet: Intracellular metabolites
Condition	1-Methylnicotinamide	α-Ketoglutarate	2-Oxoisocaproate	3-Methyl-2-oxovalerate	4-Aminobutyrate	5-Aminopentanoate	ADP	AMP	ATP	Acetate	Alanine	α-Ketoisovalerate	Arginine	Asparagine	Aspartate	Betaine	Choline	Citrate	Creatine	Creatine phosphate	Formate	Fructose	Fumarate	GTP	Glucose	Glutamate	Glutamine	GSH	GSSG	Glycerol	Glycine	Histidine	Hypotaurine	Isoleucine	Isopropanol	Lactate	Leucine	Lysine	Malate	Methionine	N,N-Dimethylglycine	N-Acetylneuraminate	NAD+	NADH	NADP+	NADPH	O-Acetylcarnitine	O-Phosphocholine	Pantothenate
Hypoxia	0.00148584	0.00247639	0.000495278	0.000627353	0.00174998	0.00118867	0.00171696	0.000330186	0.00901407	0.0477118	0.0648154	0.000132074	0.00181602	0.000957538	0.0037311	0.00118867	0.000297167	0.00772634	0.0514759	0.046259	0.00399524	0.00379713	0.00069339	0.00046226	0.0626362	0.0414383	0.023146	0.0299808	0.00264148	0.000957538	0.030179	0.00287261	0.00835369	0.0131084	0.00558014	0.193951	0.0102027	0.00419336	0.00749521	0.00346695	0.000528297	0.0182262	0.00795747	0.000858482	0.000132074	0.000264148	0.00023113	0.0920557	0.00227828
Hypoxia	0.00161379	0.00287334	0.000629772	0.000590412	0.0018106	0.00125954	0.0020074	0.000432969	0.0105093	0.0591986	0.072109	0.000157443	0.00165315	0.00106274	0.00377863	0.00125954	0.00051169	0.00842321	0.0567189	0.0553413	0.00456585	0.00358183	0.000826576	0.000472329	0.0851767	0.0476659	0.0259388	0.0328663	0.00338503	0.00122018	0.0349917	0.00346375	0.00976147	0.0153901	0.00684878	0.19889	0.0124774	0.00468393	0.00830513	0.0040148	0.000629772	0.0190506	0.00928914	0.000708494	0.000118082	0.000196804	0.000196804	0.110604	0.00232229
Hypoxia	0.00150398	0.00225596	0.00068037	0.000572943	0.00153978	0.00107427	0.0023992	0.000501325	0.00984745	0.0560052	0.0687173	0.000107427	0.00107427	0.000214854	0.00461935	0.00139655	0.000465516	0.00709017	0.0529614	0.0522094	0.00451192	0.00594428	0.000787796	0.000537134	0.11552	0.0446179	0.0231684	0.0314402	0.00333023	0.0012175	0.0321922	0.0032228	0.00888061	0.0158992	0.00633818	0.185992	0.012748	0.00598009	0.00952517	0.00422545	0.00068037	0.0160782	0.00784215	0.000608752	0.000358089	7.16178e-05	0.000179045	0.101017	0.00186206
Hypoxia	0.00162686	0.00277305	0.000332766	0.000628559	0.00151594	0.00129409	0.00188568	0.000295792	0.0095393	0.0526141	0.068402	0.000147896	0.00170081	0.000739481	0.00395622	0.00155291	0.000480663	0.00750573	0.0536493	0.0521334	0.00425201	0.0036974	0.000702507	0.000554611	0.103047	0.0475486	0.0251793	0.0288398	0.00343859	0.0011462	0.0328699	0.00314279	0.00916956	0.0149745	0.00573098	0.199179	0.0120535	0.00543519	0.00695112	0.00425201	0.000591585	0.0177475	0.00876285	0.000887377	0.000295792	0.000258818	0.00018487	0.102973	0.00262516
RO-30m	0.00111222	0.0021659	0.000585377	0.000790259	0.0013171	0.00105368	0.00146344	0.000146344	0.00649769	0.043113	0.0540011	0.000117075	0.00298542	0.000585377	0.00240005	0.0014049	0.000234151	0.00687818	0.0446936	0.0371129	0.00380495	0.0044196	0.000643915	0.000175613	0.0511912	0.0326055	0.0179711	0.0239712	0.00278054	0.000907335	0.0291811	0.00275127	0.00784406	0.0126441	0.00482936	0.202687	0.0103026	0.00559035	0.00564889	0.00386349	0.00052684	0.017093	0.00579524	0.000848797	2.92689e-05	8.78066e-05	0.000175613	0.079143	0.00184394
RO-30m	0.00138857	0.00239142	0.000694284	0.00088714	0.00146571	0.00111857	0.00204428	0.000462856	0.00833141	0.0571627	0.0697369	0.000154285	0.00262285	0.000231428	0.00397285	0.00154285	0.000231428	0.00894855	0.0571627	0.046787	0.00474427	0.00485999	0.000809998	0.00057857	0.0637584	0.0412713	0.0233742	0.0235671	0.0060557	0.000694284	0.0376456	0.00343285	0.00894855	0.0165085	0.00701998	0.282921	0.01323	0.0060557	0.00798426	0.00462856	0.000617141	0.0168557	0.00794569	0.000732855	0.000192857	0.000115714	0.000192857	0.103834	0.00246856
RO-30m	0.0018112	0.00293414	0.000652032	0.00115917	0.00188365	0.00134029	0.00213722	0.000470912	0.0105412	0.0560385	0.0788597	0.000217344	0.00282547	0.000470912	0.00427443	0.00155763	0.000507136	0.00999783	0.0641889	0.0502065	0.00561472	0.0064841	0.000941824	0.00054336	0.111063	0.0455698	0.0263711	0.0226762	0.00717235	0.00126784	0.0426357	0.00347751	0.0099616	0.019561	0.00735347	0.344925	0.0157574	0.00851264	0.00923712	0.00518003	0.000652032	0.0231109	0.00833152	0.00101427	0.000217344	3.6224e-05	0.000217344	0.108455	0.00282547
RO-30m	0.00194128	0.00363989	0.000970638	0.0012133	0.00186039	0.00165817	0.00206261	0.000566206	0.00893796	0.0609075	0.0816954	0.00024266	0.00424654	0.000808865	0.00372078	0.0014964	0.000444876	0.0108388	0.0643452	0.05201	0.00639003	0.00655181	0.000970638	0.000404433	0.132977	0.0497857	0.0293214	0.0282698	0.00582383	0.00165817	0.0438	0.00404433	0.0100299	0.0187252	0.00881663	0.357397	0.015328	0.00764378	0.00796732	0.00473186	0.000687535	0.0188466	0.00914018	0.000808865	0.000161773	0.000283103	0.000283103	0.111745	0.00262881
RO-1h	0.00232081	0.00415067	0.0012943	0.00169597	0.00267785	0.00151745	0.00236544	0.00049094	0.0092386	0.0652057	0.0897081	0.000401678	0.00397215	0.000803356	0.00499866	0.00169597	0.000714094	0.0124967	0.0800678	0.0526198	0.00593591	0.00919397	0.00165134	0.000401678	0.172945	0.0575739	0.0256181	0.0348121	0.00415067	0.00285638	0.0473088	0.00477551	0.0112916	0.0224047	0.0106668	0.496831	0.0175846	0.0108453	0.0135232	0.00602517	0.000714094	0.0185218	0.00972954	0.000937249	0.000178524	0.000178524	0.000401678	0.120414	0.00316879
RO-1h	0.00152234	0.00315089	0.000601855	0.000920484	0.00177016	0.00130992	0.00201798	0.000495645	0.00835516	0.0533527	0.0622035	0.000212419	0.0021242	0.000424839	0.0032925	0.0011329	0.000283226	0.0102669	0.0577427	0.0471571	0.00407137	0.00407137	0.00116831	0.000389436	0.0711605	0.0456702	0.017206	0.0237556	0.00697444	0.000814275	0.0328542	0.00300928	0.00895702	0.0136302	0.00708065	0.265064	0.0111874	0.00446081	0.00955888	0.00339871	0.000566452	0.0174184	0.00835516	0.000778871	0.000141613	0.000283226	0.000247823	0.0949869	0.00237202
RO-1h	0.00145106	0.0029384	0.000652978	0.000798085	0.00141479	0.00134223	0.00163245	0.000326489	0.00779946	0.0477762	0.0588043	0.000181383	0.00221287	0.000217659	0.00370021	0.00116085	0.000362766	0.00870638	0.0521294	0.046035	0.00359138	0.00507872	0.0010883	0.000399042	0.0785388	0.0421897	0.0169049	0.0290213	0.00337372	0.00137851	0.0298919	0.00308351	0.00841616	0.0133135	0.00591308	0.225604	0.0109555	0.00529638	0.00841616	0.00362766	0.000544149	0.0125154	0.00703766	0.000689255	0.00010883	3.62766e-05	0.000217659	0.0927592	0.00217659
RO-1h	0.00288584	0.00530994	0.00161607	0.0020778	0.00236639	0.00225095	0.003463	0.000808034	0.0115433	0.0868637	0.207722	0.000404017	0.0127554	0.00155835	0.00657971	0.00213552	0.000865751	0.0164493	0.0879603	0.0824195	0.00975413	0.0210666	0.00184694	0.000865751	0.732021	0.084555	0.107295	0.0433453	0.00946554	0.00334757	0.0611797	0.00911924	0.0143137	0.0451922	0.0102736	0.577687	0.036073	0.0263765	0.0148332	0.0117742	0.0010389	0.0319751	0.0125245	0.00115434	0.000577167	5.77167e-05	0.000404017	0.163742	0.0045019
RO-12h	0.00182546	0.00186056	0.000982939	0.00119357	0.00393176	0.00101804	0.00154462	0.00035105	0.00810925	0.0497437	0.0875167	0.000245735	0.00196588	0.000912729	0.00428281	0.00150951	0.00042126	0.0139718	0.0603454	0.0502352	0.00435302	0.00530085	0.00105315	0.000561679	0.117918	0.0428632	0.0400899	0.0340869	0.00326476	0.00115846	0.0259426	0.00270308	0.00870603	0.0117251	0.00645931	0.346205	0.0091975	0.00547637	0.00975918	0.00287861	0.000456365	0.0212385	0.0091975	0.000912729	0.000105315	0.000386155	0.00014042	0.0777926	0.00186056
RO-12h	0.00179721	0.00313467	0.00146284	0.0018808	0.00522444	0.00137925	0.0018808	0.000585138	0.0109922	0.0616484	0.102942	0.000459751	0.00259132	0.000961297	0.00434674	0.00154644	0.000543342	0.0193095	0.0797877	0.0666221	0.00706345	0.00906963	0.00133746	0.000626933	0.153431	0.0464766	0.039455	0.0422971	0.00388698	0.00250773	0.0387863	0.0037198	0.0110758	0.0161749	0.0084009	0.495026	0.0128312	0.00764858	0.0115774	0.00413776	0.000668729	0.0242832	0.0117863	0.00133746	4.17955e-05	0.00037616	0.000334364	0.103569	0.00242414
RO-12h	0.00148638	0.00166839	0.000970697	0.00136504	0.00388279	0.00100103	0.0010617	0.000242674	0.00737123	0.0429837	0.0772918	0.000273009	0.00266942	0.000758357	0.00409513	0.00145605	0.000485349	0.0110417	0.0494145	0.0443791	0.00409513	0.00776558	0.000879694	0.00042468	0.158345	0.0386155	0.0278469	0.0149851	0.010071	0.00197173	0.0229934	0.00279075	0.00767457	0.0135291	0.00603652	0.351453	0.0106473	0.00731056	0.0085846	0.0032761	0.000455014	0.020415	0.00715889	0.000576351	0.000364011	0.000121337	0.000242674	0.0707092	0.00172905
RO-12h	0.0018348	0.00207713	0.00100395	0.00131552	0.00401579	0.00138475	0.00141937	0.000380807	0.00862009	0.0494357	0.0777193	0.00031157	0.00235408	0.00100395	0.0036696	0.00121166	0.000415426	0.0141591	0.0582981	0.0505089	0.00401579	0.00598906	0.000969328	0.000553902	0.131032	0.0388423	0.0280413	0.0333726	0.00321955	0.00155785	0.0247525	0.00283875	0.00858547	0.0125666	0.00630063	0.357578	0.00979713	0.00519283	0.00837776	0.0031157	0.000484664	0.0222599	0.00858547	0.0011078	6.92377e-05	0.000242332	0.000207713	0.078931	0.00173094
RO-24h	0.00160549	0.00154253	0.00116477	0.00163697	0.00742933	0.00107033	0.00141661	0.000377762	0.0069886	0.045363	0.102562	0.000409243	0.00113329	0.000755525	0.00295914	0.00192029	0.000377762	0.0124032	0.0558144	0.0413965	0.00374614	0.00601272	0.000692564	0.000472203	0.0937166	0.0362337	0.03743	0.0228546	0.00843669	0.00236102	0.0273248	0.00289618	0.00831077	0.0125606	0.00535163	0.449946	0.0100737	0.00462759	0.00642196	0.0034943	0.000440723	0.015929	0.00947554	0.000912926	0.000157401	0.000251842	0.000346282	0.0648492	0.00198325
RO-24h	0.00187958	0.00201147	0.00122007	0.00161578	0.00784805	0.00141793	0.00148387	0.000230825	0.00705665	0.0482095	0.108224	0.0003957	0.00227528	0.00115412	0.00349535	0.0021104	0.00032975	0.0116402	0.0638396	0.0459342	0.00385808	0.00600145	0.000758425	0.000428675	0.0866253	0.0397679	0.0391743	0.0304359	0.0038251	0.00217635	0.0308976	0.00293478	0.00920003	0.0130911	0.006595	0.453934	0.0101893	0.00530898	0.00768318	0.00346238	0.000428675	0.0198839	0.0096287	0.00098925	0.000164875	3.2975e-05	0.0003957	0.0720834	0.00201147
RO-24h	0.00156038	0.00170759	0.000942119	0.00132485	0.00780192	0.00117765	0.00114821	0.000353294	0.00612377	0.0406583	0.0956839	0.000294412	0.00144262	0.000942119	0.00317965	0.00167815	0.000294412	0.0111288	0.054849	0.0410999	0.00317965	0.00453395	0.000765471	0.000294412	0.0801095	0.038303	0.0353	0.0203439	0.00833186	0.00170759	0.0239063	0.00273803	0.00744863	0.0112171	0.00612377	0.378879	0.00874404	0.00468115	0.00697757	0.00267915	0.000412177	0.0176647	0.00762527	0.000765471	0.000147206	0.000206088	0.000323853	0.0649179	0.00179591
RO-24h	0.00201625	0.00201625	0.00118603	0.00157149	0.00809464	0.00154184	0.00148254	0.000326158	0.00670106	0.0429639	0.103451	0.00041511	0.00195695	0.000711617	0.00323193	0.0019866	0.000326158	0.011119	0.0617624	0.0449801	0.00343948	0.00554468	0.000770919	0.000444761	0.0893673	0.0397023	0.0367372	0.0233055	0.00744233	0.00174939	0.0295914	0.00275752	0.00856906	0.0130167	0.00720512	0.438356	0.00996264	0.00498132	0.00717547	0.00343948	0.000474411	0.0175236	0.00859871	0.00083022	0.000148254	8.89521e-05	0.000385459	0.0696495	0.0022238
Normoxia	0.00151678	0.00154838	0.000853188	0.000979587	0.00963787	0.00328635	0.00135878	0.000379195	0.011123	0.0455982	0.101877	0.000252797	0.00265436	0.00189597	0.0130506	0.00164318	0.000347595	0.0108703	0.0396891	0.045693	0.00426594	0.00859508	0.000884788	0.000347595	0.28506	0.0790937	0.029988	0.0512861	0.00398155	0.00186437	0.0302408	0.00410794	0.00850028	0.0186437	0.00663591	0.209474	0.0140618	0.011123	0.00831069	0.00426594	0.000537193	0.0253113	0.00821589	0.000473994	0.000157998	0.000442394	0.000126398	0.0989383	0.00303356
Normoxia	0.00162877	0.00194199	0.000532481	0.000563804	0.00986657	0.00328885	0.00156612	0.000344547	0.0127169	0.0460753	0.0868884	0.00012529	0.00150348	0.000720416	0.0128422	0.00200464	0.000313224	0.0106496	0.0408131	0.0479233	0.00294431	0.00566936	0.000845706	0.000532481	0.182203	0.0777736	0.0250579	0.0259663	0.0223642	0.000939673	0.0287227	0.00325753	0.00930276	0.0148155	0.00610787	0.125791	0.011464	0.00610787	0.00848838	0.00366473	0.000657771	0.0187935	0.00864499	0.000532481	0.000219257	0.000219257	0.000219257	0.106183	0.00291299
Normoxia	0.00181526	0.00167563	0.000593451	0.000698178	0.0105425	0.00418907	0.00181526	0.000418907	0.0144872	0.0497103	0.0984082	0.000174544	0.00265307	0.00108218	0.0127417	0.00230399	0.000349089	0.0110661	0.0444739	0.0510717	0.00335125	0.00624869	0.00101236	0.000663269	0.19549	0.0876213	0.0265657	0.0585422	0.00324653	0.00185017	0.032186	0.00387489	0.00939049	0.0169308	0.00569015	0.154262	0.0129861	0.00813377	0.00795923	0.00446834	0.000663269	0.021085	0.00918104	0.000593451	0.000244362	0.000558542	0.000174544	0.111639	0.00307198
Normoxia	0.00166009	0.00169141	0.000720416	0.000845706	0.0103677	0.00366473	0.00166009	0.000344547	0.00996053	0.0463259	0.092965	0.000219257	0.00275637	0.00169141	0.0132807	0.00238051	0.000281902	0.0123097	0.0419407	0.0492389	0.0036334	0.00742342	0.000877028	0.000501159	0.245693	0.08432	0.0262169	0.057414	0.00291299	0.00150348	0.0313851	0.00388398	0.00930276	0.0178851	0.00513688	0.160747	0.0137192	0.00892689	0.00773664	0.00422853	0.000595126	0.0220197	0.00867631	0.000689094	0.000219257	0.000438514	0.000187935	0.109347	0.00322621
Norm-12h	0.00179969	0.00217106	0.000885562	0.00114266	0.0110267	0.00325659	0.00245672	0.00065703	0.0154831	0.0450494	0.133806	0.000285665	0.00254242	0.00117123	0.00805576	0.00179969	0.000171399	0.0132549	0.0431069	0.0469062	0.00351368	0.00642747	0.0011141	0.000685597	0.151688	0.0673599	0.0408216	0.0490202	0.00265669	0.00182826	0.0260527	0.00348512	0.00836999	0.0158544	0.00519911	0.295835	0.0114837	0.00731303	0.0100269	0.00348512	0.000571331	0.0196823	0.00996972	0.00105696	0.000371365	0.000342798	0.000228532	0.0874422	0.00288522
Norm-12h	0.00176936	0.00174128	0.00109532	0.00162894	0.013537	0.00306128	0.00238724	0.000421277	0.0183958	0.0434758	0.142813	0.000449362	0.00300511	0.00148851	0.00457788	0.00134809	0.000196596	0.0184239	0.0445711	0.0447116	0.00404426	0.00589788	0.000758299	0.000730214	0.109701	0.0534741	0.0423805	0.0457507	0.00261192	0.00129192	0.0303881	0.00337022	0.00772342	0.0143515	0.00556086	0.419761	0.0107566	0.00665618	0.00676852	0.00258383	0.000505533	0.0186485	0.0107566	0.00112341	0.000421277	0.000308937	0.000365107	0.0556648	0.00258383
Norm-24h	0.00166635	0.00135195	0.00122618	0.00169779	0.010061	0.00220084	0.0020122	0.000282965	0.0172923	0.0436081	0.128372	0.00050305	0.00254669	0.0011633	0.00308118	0.00125762	6.28812e-05	0.0115387	0.0450544	0.0375401	0.00515626	0.00842608	0.00050305	0.000628812	0.14513	0.0350563	0.0413444	0.0294913	0.00292398	0.00248381	0.0329183	0.00320694	0.00716846	0.0149343	0.00666541	0.418286	0.0112872	0.00789159	0.00408728	0.00364711	0.000440169	0.0142112	0.00911778	0.000974659	0.000125762	0.000345847	0.000314406	0.0513111	0.00213796
Norm-24h	0.00163908	0.00163908	0.000928809	0.00147517	0.0116101	0.00278643	0.00185762	0.000327815	0.0171557	0.0400208	0.12222	0.000409769	0.0018303	0.00103808	0.00398842	0.00133858	8.19538e-05	0.0133038	0.0405944	0.0404852	0.00368792	0.00535431	0.000573676	0.000764902	0.0987543	0.0416598	0.0359777	0.0359231	0.00254057	0.00174835	0.0276184	0.00295034	0.00666557	0.0124023	0.00631044	0.350899	0.00942468	0.00614653	0.00560017	0.00330547	0.000437087	0.0159537	0.00876905	0.00112003	0.000273179	0.000300497	0.000327815	0.0518221	0.00139321
Norm-24h	0.00146131	0.0020766	0.00079475	0.00105112	0.00984464	0.00261498	0.00192278	0.000461467	0.0121007	0.0391222	0.115213	0.000307645	0.00133313	0.000922935	0.00710147	0.00102548	0.000128185	0.0113316	0.0361483	0.0374301	0.00353792	0.00589653	0.00102548	0.000487105	0.128185	0.0618623	0.0307132	0.0429677	0.00238425	0.00192278	0.0224581	0.00299954	0.006358	0.012998	0.00661437	0.259037	0.00938317	0.00707583	0.00874224	0.00315336	0.000461467	0.0183562	0.0079475	0.000948572	0.000205097	0.000410193	0.000256371	0.0692201	0.00217915
Norm-24h	0.00154485	0.00202603	0.000759763	0.00116497	0.0102821	0.00303905	0.00200071	0.000658461	0.0103834	0.0388492	0.122094	0.000303905	0.00255787	0.000987692	0.00701515	0.0013929	7.59763e-05	0.0125108	0.0390771	0.0410778	0.00321633	0.0059768	0.00103834	0.000481183	0.136327	0.0633136	0.0371524	0.0454085	0.00235527	0.00162083	0.0236286	0.00311503	0.00709112	0.013853	0.00696449	0.280935	0.0102821	0.00610343	0.00972497	0.00326698	0.000481183	0.0176518	0.00848402	0.00101302	0.000151953	0.000253254	0.000253254	0.0767867	0.00291243
[truncated: 19 more columns]

## Sheet: Extracellular metabolites
	Normoxia			Hypoxia			RO-30m			RO-1h			Norm-12h			RO-12h			Norm-24h			RO-24h
1-Methylnicotinamide	0.0133179	0.0107402	0.0128883	0.0149295	0.0124412	0.00646943	0.00868921	0.0112449	0.0132894	0.0153417	0.014319	0.0122734	0.0128401	0.0139731	0.0143507	0.0146118	0.0132835	0.0132835	0.0191141	0.0218944	0.0211993	0.020547	0.020136
2-Oxoisocaproate	0.255188	0.238433	0.2307	0.284655	0.301077	0.273209	0.28521	0.296455	0.382836	0.303255	0.335473	0.302232	0.254159	0.254914	0.252271	0.315703	0.288251	0.285151	0.209908	0.246746	0.216511	0.272042	0.256837
3-Methyl-2-oxovalerate	0.286979	0.257765	0.257336	0.357312	0.335913	0.320486	0.351657	0.362902	0.474328	0.383032	0.420875	0.379452	0.287014	0.317982	0.320625	0.398061	0.375036	0.362638	0.300961	0.346487	0.309997	0.396556	0.348476
Acetate	-0.0438201	-0.0588564	-0.0519826	-0.0579761	-0.069422	-0.0579761	-0.0932812	-0.0937923	-0.0370569	-0.0994656	-0.0498606	-0.0744074	-0.0862302	-0.0866079	-0.0866079	-0.0885563	-0.0898847	-0.108039	-0.107966	-0.085724	-0.090937	-0.0754758	-0.0643805
Alanine	3.37601	2.66844	2.68262	2.59374	2.00702	1.88957	1.01101	1.62335	3.93468	1.87987	2.85407	2.55951	3.7614	4.77841	4.73725	5.60901	5.31544	4.665	4.22921	6.28693	4.67509	8.8793	6.64133
Alpha-ketoisovaleric acid	0.0726039	0.0635821	0.0640117	0.0691732	0.0676802	0.0627037	0.0679803	0.0710471	0.0935368	0.0792656	0.0807998	0.0751745	0.0793066	0.0857267	0.0838384	0.0929841	0.0858996	0.077044	0.0861874	0.101826	0.0920954	0.0998582	0.0924613
Arginine	-0.463261	-0.635534	-0.581404	-0.47401	-0.342631	-0.465053	-0.37798	-0.0927701	-0.122416	-0.213506	-0.182311	-0.20788	-0.578309	-0.690471	-0.478609	-0.213864	-0.376807	-0.32633	-0.486194	-0.360389	-0.582808	-0.398474	-0.597369
Aspartate	0.00873538	0.0100242	0.0134611	0.00622061	0.0102018	0.00671826	0.0109893	0.00536686	0.00281121	0.0166202	0.00843796	0.0109949	0.0177496	0.0181272	0.0264355	0.00368985	0.00059038	0.00634654	0.0161022	0.0181874	0.0147121	0.00438335	-0.0063011
Choline	-0.110696	-0.0978076	-0.0960891	-0.102018	-0.0831073	-0.0811167	-0.0925145	-0.0848476	-0.0495796	-0.0986985	-0.0715948	-0.0721062	-0.132681	-0.132304	-0.13608	-0.0732066	-0.0740921	-0.0833905	-0.132525	-0.126617	-0.128007	-0.0765717	-0.0868452
Citrate	-0.0004296	-0.0012888	-0.0025777	0.00074647	0.00671826	0.00671826	-0.0069003	-0.0023001	0.00996703	-0.0007671	0.00076709	-0.0012785	-0.0002518	-0.0036506	-0.0010071	0.00073797	0.0025091	0.00605135	-0.0027802	0.00069506	-0.0017376	-0.0028766	-0.0061641
Creatine	-0.0366599	-0.0366599	-0.0349415	-0.0574784	-0.0375725	-0.0380701	-0.0477906	-0.0457461	-0.0242787	-0.0600885	-0.0365645	-0.0391214	-0.0514864	-0.0495981	-0.0514864	-0.04723	-0.0609563	-0.0622846	-0.0562998	-0.0399659	-0.0559523	-0.0532851	-0.0573945
Cystine	-0.539445	-0.499062	-0.526557	-0.705915	-0.731792	-0.753689	-0.811419	-0.797618	-0.769506	-0.769388	-0.741773	-0.754558	-0.555902	-0.591023	-0.559678	-0.727047	-0.724833	-0.712878	-0.483182	-0.51585	-0.53844	-0.650517	-0.668598
Formate	0.200627	0.129312	0.148645	0.204534	0.184628	0.15228	0.12676	0.208541	0.282655	0.174384	0.237286	0.218875	0.180895	0.183538	0.160879	0.280576	0.262865	0.216373	0.176198	0.177935	0.208518	0.246016	0.271083
Fructose	0.173132	0.0738927	0.00300726	0.203538	0.0995297	0.0253801	0.0802474	0.0255565	0.594955	-0.0526733	0.28689	0.174384	-0.149298	-0.0624382	-0.103224	0.127669	-0.0609563	-0.0423594	-0.209908	0.0875775	-0.139012	0.0998582	-0.116296
Fumarate	0.00443929	0.00358007	0.00272085	0.00547413	0.00398119	0.00199059	0.00153339	0.00460017	0.00817808	0.00306835	0.0056253	0.00511391	0.00402827	0.00440592	0.00591653	0.00531338	0.0048706	0.00354225	0.00405452	0.00474958	0.00544464	0.00561617	0.00643805
Glucose	-22.8678	-23.2673	-22.5842	-51.3392	-43.8635	-43.9979	-48.9343	-45.7857	-37.3776	-57.9992	-45.5826	-42.1941	-40.3844	-38.6167	-39.1877	-45.7312	-46.6274	-45.8862	-48.8327	-44.6227	-50.9363	-48.7015	-51.9907
Glutamate	0.873538	0.8164	0.809096	0.66461	0.769116	0.701933	0.716348	0.872243	1.20294	0.838937	0.966274	0.917692	0.753539	0.833978	0.792437	0.602183	0.451194	0.4999	0.698999	0.884232	0.66355	0.635175	0.477785
Glutamine	-0.708568	-0.868382	-0.842606	-0.589714	-1.20381	-1.1859	-1.95303	-1.62233	-0.723249	-1.73055	-0.914367	-0.934823	-0.562574	-0.072383	-0.0950421	0.876855	0.715683	0.43983	-0.505888	0.34139	-0.0624395	2.54878	1.42281
Glycine	-0.0144635	-0.0836305	-0.103822	0.0450372	0.0669337	-0.0007465	-0.106059	0.045235	0.615656	-0.0948631	0.234984	0.159298	-0.18165	-0.14313	-0.186937	0.14479	0.06686	-0.0225819	-0.244777	-0.0213152	-0.167973	0.210812	0.0382173
Histidine	-0.0360871	-0.0631525	-0.0756111	-0.0221454	-0.0136853	-0.0340889	-0.0861254	0.00383347	0.138772	-0.0682707	0.0334961	0.0380986	-0.0964268	-0.0839643	-0.0964268	-0.0231722	-0.0386696	-0.062137	-0.0911687	-0.0498126	-0.0974242	-0.0846535	-0.114652
Hypoxanthine	-0.0270653	-0.0270653	-0.0270653	-0.0276195	-0.0276195	-0.0276195	-0.0283677	-0.0283677	-0.0283677	-0.0283822	-0.0283822	-0.0283822	-0.0235402	-0.0235402	-0.0235402	-0.022877	-0.022877	-0.022877	-0.0189983	-0.0189983	-0.0141329	-0.0234235	-0.0234235
Isoleucine	-0.549613	-0.619639	-0.549183	-0.666103	-0.496405	-0.513822	-0.707148	-0.564543	0.213397	-0.835869	-0.351581	-0.377662	-0.938714	-0.808802	-0.839391	-0.568236	-0.72321	-0.739593	-1.04224	-0.687762	-1.04016	-0.634901	-0.927079
Lactate	53.2438	45.2157	46.2855	98.4991	95.1987	90.4541	89.9757	98.4733	132.383	106.567	111.741	102.913	64.4986	72.3318	70.9961	106.01	101.119	93.5386	74.0603	92.5447	79.3354	109.052	94.1
Leucine	-0.707565	-0.675774	-0.659879	-0.745975	-0.585235	-0.583244	-0.763117	-0.661402	-0.035268	-0.86374	-0.491447	-0.487356	-1.01512	-0.951302	-0.973961	-0.686016	-0.730737	-0.805567	-1.06147	-0.787966	-1.0361	-0.704624	-0.935983
Lysine	-0.353282	-0.449514	-0.389798	-0.267984	-0.0948021	-0.234144	-0.438294	-0.188862	0.675969	-0.43187	0.0559973	0.0457695	-0.691604	-0.559804	-0.639488	-0.242644	-0.375036	-0.431712	-0.870678	-0.500907	-0.940879	-0.198621	-0.515044
Methionine	-0.172273	-0.178717	-0.193324	-0.156759	-0.120431	-0.142327	-0.156917	-0.143627	0.0301567	-0.21325	-0.0905162	-0.0685264	-0.272664	-0.262089	-0.274552	-0.159254	-0.201318	-0.218144	-0.321813	-0.228327	-0.308607	-0.165608	-0.260124
N,N-Dimethylglycine	0.0001432	0.00100242	0.0001432	0.00024882	0.00174177	0.00024882	-0.0007667	-0.0007667	0.00536686	0.00281265	0.00332404	0.00127848	-0.0003777	-0.0003777	-0.0003777	0.00664172	0	0	-0.0004634	-0.0008109	-0.0008109	0.00479429	0.00232866
Niacinamide	-0.0189028	-0.0223396	-0.0154659	-0.0253801	-0.0159248	-0.0238871	-0.0286233	-0.0214675	0.0240231	-0.0225012	-0.0076709	-0.0040911	-0.0327297	-0.027065	-0.0440592	-0.0224343	-0.0211059	-0.0206631	-0.0375332	-0.0312777	-0.0305826	-0.0371215	-0.0252043
Pantothenate	0.00930819	0.00372327	-0.001432	0.0156759	0.0236383	0.0211501	0.0150783	0.0166117	0.0227453	0.0109949	0.0217341	0.015086	0.00490946	0.00642006	0.00377651	0.0135786	0.0211059	0.0215487	-0.0013901	0.0145963	-0.0013901	0.00780784	-0.006986
Phenylalanine	-0.130458	-0.193181	-0.16053	-0.221454	-0.0860932	-0.143323	-0.256076	-0.117049	0.259143	-0.256207	-0.0618783	0.0056253	-0.332207	-0.280846	-0.295575	-0.129735	-0.166043	-0.210321	-0.494188	-0.227285	-0.405567	-0.16917	-0.28711
Proline	0.286549	0.148645	0.145637	0.147553	0.0186618	0.0191595	-0.0130338	-0.0656802	0.113726	0.067248	-0.0943517	-0.0698049	0.299225	0.346809	0.402324	0.259175	0.179031	0.168847	0.386917	0.483878	0.492218	0.27259	0.327656
Pyroglutamate	-0.0386648	-0.0532715	-0.0545603	-0.452114	-0.477494	-0.478489	-0.551765	-0.46385	-0.435227	-0.58273	-0.462042	-0.423176	-0.203176	-0.0910138	-0.189203	-0.10553	-0.0860472	-0.151579	-0.325636	-0.185233	-0.304089	0.227934	0.0849274
Pyruvate	-0.193038	-0.224399	-0.253183	-0.0525019	-0.0052253	-0.111722	-0.215952	-0.141327	0.0391014	0.0135519	-0.118899	-0.15265	0.0556405	0.0201414	0.0227849	-0.0580044	-0.118223	-0.215192	-0.0542147	-0.0455264	-0.0761091	-0.307656	-0.207798
Serine	-0.876974	-0.896307	-0.89244	-0.588221	-0.43395	-0.439921	-0.522375	-0.55202	-0.153339	-0.60651	-0.368713	-0.365645	-1.02834	-1.04911	-1.0578	-0.75568	-0.922609	-0.784018	-1.12924	-1.08128	-1.14835	-0.855986	-1.02242
Succinate	0.0306454	0.00830577	0.0250605	0.00124412	0.0345866	0.0181642	-0.0048557	0.0299011	0.112193	0.0145746	0.0524176	0.0406556	0.00503534	0.0144766	0.0144766	0.0218439	0.00900322	0.013431	-0.0064872	0.036259	-0.0210835	0.0313684	-0.0101365
Taurine	0.108405	0.0942275	0.0770432	0.0308542	-0.0004976	0.0313519	0.0327123	0.0148228	0.0592911	0.0542075	0.0403999	0.0194329	0.0727607	0.0757819	0.0920209	0.0367509	0.0340942	0.0349797	0.0166814	-0.0121635	0.00556048	0.00465731	0.0305465
Threonine	0.0362303	0.25576	0.172416	0.57777	0.0721591	0.657394	0.386925	0.551509	1.60239	0.571735	0.726687	1.16699	-0.141493	-0.0459475	0.265614	0.314227	0.0582996	-0.151136	-0.327373	0.453527	-0.139359	0.571342	0.533947
Tryptophan	-0.0461113	-0.0559923	-0.0474002	-0.053746	-0.0358307	-0.0472766	-0.0613356	-0.0316901	0.0347568	-0.0639239	-0.009205	-0.0240354	-0.0857267	-0.0834608	-0.0838384	-0.043983	-0.0492963	-0.0546097	-0.0882726	-0.0483067	-0.0806269	-0.0564357	-0.0716404
Tyrosine	-0.133751	-0.187023	-0.171127	-0.151534	-0.111722	-0.159994	-0.248665	-0.105548	0.334534	-0.272316	0.00485822	0.0217341	-0.358516	-0.283741	-0.303757	-0.0928365	-0.157483	-0.20486	-0.413329	-0.2274	-0.410201	-0.175608	-0.313273
Valine	-0.421733	-0.454383	-0.460397	-0.500137	-0.297096	-0.349349	-0.548442	-0.370569	0.533108	-0.633102	-0.091539	-0.150349	-0.874261	-0.746238	-0.767764	-0.430974	-0.60543	-0.636425	-0.970651	-0.570992	-0.902883	-0.483675	-0.786127
myo-Inositol	-0.117283	-0.119002	-0.173132	-0.224937	-0.195576	-0.146806	-0.218764	-0.174806	-0.0332234	-0.260298	-0.115574	-0.13961	-0.241193	-0.225709	-0.223821	-0.176965	-0.209288	-0.245596	-0.239448	-0.252307	-0.304784	-0.337381	-0.384639

## Sheet: Lipid classes
	CE	CER	DAG	FFA	HCER	LCER	LPC	LPE	PC	PE	SM	TAG
Normoxia	0.0309805	0.119727	0.0669959	0.116415	0.0114789	0.0014067	0.0387229	0.00397742	0.999708	0.494601	0.84092	2.24371
Normoxia	0.0305646	0.109746	0.0622025	0.0874733	0.00959131	0.00108601	0.0333557	0.00361482	0.86075	0.423294	0.761504	1.94104
Normoxia	0.0203468	0.0875988	0.0482268	0.0855155	0.0078414	0.000918191	0.0304597	0.00292061	0.690015	0.371602	0.651921	1.63925
Hypoxia	0.0446412	0.0603414	0.0851211	0.102649	0.00761508	0.00111405	0.0330211	0.00386562	0.892508	0.376917	0.71804	2.04008
Hypoxia	0.0303338	0.047412	0.0648596	0.0902609	0.00546527	0.000829383	0.0325056	0.00363695	0.670729	0.259778	0.626147	1.43124
Hypoxia	0.0367459	0.0524881	0.074863	0.125072	0.00628506	0.000906384	0.0319677	0.00336109	0.785389	0.314635	0.630926	1.66514
RO-30m	0.0405378	0.0485949	0.0958477	0.0946669	0.00693652	0.000872172	0.0350652	0.00474746	0.819967	0.341514	0.701088	1.91206
RO-30m	0.0403733	0.0440305	0.0942511	0.1049	0.00577566	0.000965307	0.03683	0.00453944	0.745811	0.313434	0.636846	1.85589
RO-30m	0.0355097	0.0294673	0.0881555	0.0751066	0.00525506	0.000857579	0.0260338	0.00379516	0.829277	0.349382	0.69842	1.67568
RO-60m	0.0272216	0.0412245	0.0711529	0.102098	0.00477744	0.000552682	0.0320505	0.00306656	0.648985	0.287854	0.572185	1.41837
RO-60m	0.0365949	0.0543394	0.0818161	0.116064	0.00641982	0.00093733	0.0386872	0.00382975	0.829299	0.361146	0.647362	1.85464
RO-60m	0.0345254	0.0840265	0.0693821	0.242111	0.00425263	0.000832209	0.129657	0.0111811	0.752124	0.311737	0.792296	1.90599
Norm-12h	0.0298677	0.118715	0.146241	0.140376	0.0109753	0.0014138	0.060812	0.00592744	0.976489	0.451487	0.771203	1.75955
Norm-12h	0.0351743	0.146683	0.155369	0.136343	0.0127809	0.00162279	0.0573022	0.0063362	1.1257	0.501363	0.815587	2.12715
Norm-12h	0.0251893	0.111702	0.134564	0.109829	0.0109894	0.00119458	0.0516699	0.0051402	0.993819	0.5049	0.777449	1.98466
RO-12h	0.0232164	0.0378613	0.090993	0.0882877	0.00883899	0.00130289	0.0301631	0.00318358	0.993742	0.406342	0.909462	2.2337
RO-12h	0.0246152	0.0451122	0.0982379	0.103192	0.00817529	0.00114564	0.0701035	0.00595802	0.886811	0.374104	0.807438	2.27624
RO-12h	0.0233504	0.041355	0.0979101	0.102803	0.00908894	0.00122378	0.0423941	0.0038946	0.993321	0.40082	0.899633	2.27891
Norm-24h	0.0332983	0.105387	0.187458	0.109245	0.0112554	0.00133547	0.0637594	0.00694829	1.12075	0.499055	0.771954	2.02388
Norm-24h	0.0342895	0.143921	0.170369	0.0928996	0.0136511	0.00170087	0.0711118	0.00589564	1.25124	0.574382	0.863409	2.5834
Norm-24h	0.0289397	0.128321	0.178604	0.110097	0.0127572	0.00149724	0.0608551	0.00571445	1.16281	0.56047	0.829767	2.51567
RO-24h	0.0309931	0.072707	0.137681	0.108682	0.00874531	0.000963547	0.0331298	0.00339237	0.876853	0.349796	0.776713	1.865
RO-24h	0.0289585	0.114702	0.146073	0.108918	0.0130469	0.00169208	0.0531962	0.00409696	1.26952	0.616917	1.00371	2.90331
RO-24h	0.0227105	0.0873063	0.103784	0.100627	0.0109475	0.00132272	0.0379249	0.00333982	1.04772	0.504254	0.825617	2.31854

## Sheet: Lipid species
Condition	CE(14:0)	CE(15:0)	CE(16:0)	CE(16:1)	CE(17:0)	CE(18:0)	CE(18:1)	CE(18:2)	CE(18:3)	CE(20:3)	CE(20:4)	CE(20:5)	CE(22:5)	CE(22:6)	CER(16:0)	CER(22:0)	CER(24:0)	CER(24:1)	DAG(14:0/16:0)	DAG(14:0/18:1)	DAG(14:1/18:1)	DAG(16:0/16:0)	DAG(16:0/16:1)	DAG(16:0/18:0)	DAG(16:0/18:1)	DAG(16:0/18:2)	DAG(16:0/20:4)	DAG(16:0/22:5)	DAG(16:0/22:6)	DAG(16:1/18:1)	DAG(18:0/18:1)	DAG(18:0/18:2)	DAG(18:1/18:1)	DAG(18:1/18:2)	DAG(18:1/20:4)	DAG(18:1/22:6)	FFA(12:0)	FFA(14:0)	FFA(14:1)	FFA(15:0)	FFA(16:0)	FFA(16:1)	FFA(17:0)	FFA(18:0)	FFA(18:1)	FFA(18:2)	FFA(18:3)	FFA(18:4)	FFA(20:0)
Hypoxia	0.00151876	0.00093957	0.012392	0.00443392	0.00144099	0.00355139	0.0127814	0.00271578	0.000552231	0.00041871	0.00208785	0.000587231	0.000219596	0.00100179	0.0408454	0.00291593	0.0101481	0.00643206	0.00526486	0.00189833	9.51496e-05	0.0103047	0.00804416	0.0142043	0.0158016	0.000599676	0.000523971	0.000859976	0.000824716	0.00394495	0.0162841	0.00130202	0.00430196	0.000254078	0.000190558	0.000422081	0.0013155	0.00411243	0.000577639	0.00660784	0.0375115	0.0044404	0.00578831	0.02482	0.00936511	0.00170854	0.00045397	9.64459e-05	0.00137565
Hypoxia	0.00104587	0.00060538	0.00853702	0.00309275	0.00108994	0.00211974	0.00857176	0.00197481	0.000358561	0.000311375	0.0014231	0.000357006	0.000118483	0.000728011	0.0308005	0.00257993	0.00863061	0.00540097	0.00376917	0.00157114	0.000228411	0.00758864	0.00596435	0.0100104	0.0117871	0.000543675	0.000400302	0.000588268	0.000639602	0.00356928	0.012399	0.00109228	0.0037881	0.000318894	0.000162817	0.000438155	0.00116383	0.00387054	0.000596046	0.00467166	0.0307642	0.00501648	0.00424777	0.0208738	0.0109687	0.00123565	0.000395636	9.90386e-05	0.000896014
Hypoxia	0.00131369	0.000783753	0.0103617	0.00353609	0.00124395	0.00269504	0.0103819	0.0023453	0.00043634	0.000303079	0.00183144	0.000509971	0.000202485	0.000801123	0.0349443	0.00241841	0.00910947	0.00601594	0.00483889	0.00164477	9.51496e-05	0.00960337	0.00666099	0.0139193	0.0131107	0.000665788	0.00041171	0.000695085	0.000773642	0.00334709	0.0135424	0.00108139	0.00366883	0.000318375	0.000106816	0.000378784	0.00163388	0.00630917	0.000928162	0.00841672	0.0445632	0.00714348	0.00577561	0.0270256	0.0102186	0.00197585	0.000454229	8.99644e-05	0.00528119
RO-30m	0.00136252	0.000894726	0.0111575	0.00406554	0.00137818	0.00298269	0.0116821	0.00265552	0.000494328	0.000363781	0.00204418	0.000492736	0.000193698	0.000770282	0.0283248	0.00291317	0.0107553	0.00660166	0.00584597	0.00290547	0.000335124	0.0114163	0.00914415	0.0141938	0.0181063	0.000658043	0.000427993	0.000687761	0.000891808	0.00538826	0.0177218	0.00142196	0.00553765	0.000426667	0.000146202	0.000592504	0.00121977	0.00408809	0.000676617	0.00543602	0.0326822	0.00512186	0.00436617	0.022175	0.0111398	0.00114415	0.000426136	6.66003e-05	0.00101599
RO-30m	0.0013198	0.000835821	0.0112698	0.00399151	0.00163476	0.00305884	0.0112379	0.00254567	0.000513964	0.000395091	0.00194706	0.000476816	0.000168756	0.000977512	0.0247485	0.00291635	0.0105236	0.00584199	0.00551244	0.00317294	0.000382355	0.0114038	0.00991735	0.0127095	0.0179123	0.00072597	0.000429055	0.00065141	0.000858905	0.00561035	0.0167339	0.0012609	0.00572949	0.000427463	0.00017141	0.000641592	0.00140206	0.00452617	0.000746667	0.00584411	0.0354972	0.00582793	0.00504305	0.0239629	0.013059	0.00135748	0.000426667	8.78275e-05	0.00123171
RO-30m	0.00119642	0.00089738	0.00957638	0.003481	0.0012203	0.00278289	0.010149	0.00225698	0.000462488	0.000345738	0.00174726	0.000479469	0.000141161	0.000773201	0.0151294	0.00198501	0.0084861	0.0038668	0.00567695	0.00264013	0.000245174	0.0113321	0.00935562	0.0115245	0.0179916	0.000646633	0.000441526	0.000631244	0.000733134	0.00390182	0.0165636	0.00132192	0.00440199	0.000330614	0.000144345	0.000272504	0.00111443	0.00319098	0.000505207	0.00490242	0.0283035	0.00299197	0.00401857	0.017781	0.00609539	0.00104438	0.000360597	6.7927e-05	0.00076471
RO-60m	0.000748059	0.000623825	0.00774313	0.00260069	0.00100529	0.00219613	0.00768738	0.00169787	0.000300232	0.00024369	0.00124526	0.000359695	0.00012795	0.000642407	0.0247661	0.00229621	0.00852729	0.00563486	0.004684	0.00264741	0.000440659	0.00942506	0.00865922	0.00630461	0.0150846	0.0004903	0.000266254	0.000480212	0.000544188	0.00549152	0.0105519	0.000740891	0.00460542	0.000312974	8.14954e-05	0.000342175	0.00145948	0.00459188	0.000763986	0.00570601	0.0365752	0.00560407	0.00479761	0.0235362	0.0110927	0.00132012	0.000454994	8.14954e-05	0.00110351
RO-60m	0.00110244	0.000769295	0.0102156	0.00348254	0.00120571	0.00287358	0.0105992	0.00238593	0.000482601	0.000316956	0.00167504	0.000471983	0.000173078	0.000840969	0.0360823	0.00275385	0.00912536	0.00637788	0.0052234	0.0033145	0.000441456	0.0100953	0.00942002	0.007595	0.0171923	0.000633381	0.000366331	0.000611879	0.000755226	0.00595076	0.0126477	0.00106953	0.0054071	0.000473576	0.000126358	0.000492158	0.00145895	0.00519474	0.00078655	0.00617374	0.0407535	0.00654405	0.00517642	0.0277514	0.0128991	0.00149479	0.000451278	9.55646e-05	0.00120597
RO-60m	0.00117279	0.000730539	0.0100831	0.00332963	0.00127844	0.00271059	0.00936321	0.00219852	0.000371109	0.000293861	0.00163469	0.000458976	0.000163522	0.000736379	0.0577625	0.00408035	0.0129331	0.00925066	0.00576069	0.00231187	0.000272094	0.015487	0.00787347	0.0120735	0.0114951	0.00037456	9.39719e-05	0.000206526	0.000305807	0.00403973	0.00506519	0.000316425	0.00318124	0.00030209	7.19389e-05	0.00015078	0.0022179	0.0179932	0.00167636	0.00672271	0.0757729	0.0229079	0.00673943	0.0462984	0.0429468	0.00353563	0.000810441	0.000116005	0.00159089
RO-12h	0.000731891	0.000566633	0.00588012	0.00240073	0.000795228	0.0016999	0.00662803	0.00162152	0.000298241	0.000252133	0.00131988	0.000356967	9.05157e-05	0.000574641	0.024829	0.00188044	0.00713278	0.00401909	0.00416372	0.00267179	0.000405986	0.0093566	0.0103224	0.0059306	0.0215083	0.000689909	0.000482184	0.000702042	0.000671223	0.00596384	0.0190908	0.00157347	0.00644772	0.00043632	0.000218402	0.000357695	0.00112356	0.00403438	0.000593327	0.00522346	0.0310447	0.00490459	0.00440299	0.0198756	0.0101586	0.00137545	0.000414479	7.28008e-05	0.000797654
RO-12h	0.000721213	0.00051179	0.00659041	0.00249877	0.000840121	0.00167782	0.0071323	0.00162977	0.000290961	0.000258928	0.00132789	0.000377351	0.000120364	0.000637492	0.0304579	0.00209205	0.00739899	0.00516328	0.00412732	0.00285865	0.000448696	0.00986597	0.0111737	0.00641885	0.0233339	0.000594783	0.000574884	0.00069913	0.000848857	0.00749606	0.0195276	0.00149776	0.00765816	0.000408413	0.000209424	0.000495774	0.00135628	0.00480073	0.000777513	0.00624607	0.0352654	0.0068508	0.00506815	0.0210681	0.0140632	0.00172465	0.000436077	7.71689e-05	0.000941072
RO-12h	0.000841577	0.000496744	0.00623539	0.00263418	0.000779697	0.00151426	0.0066341	0.00142665	0.000308675	0.000226896	0.00129294	0.000314985	0.000129828	0.000514459	0.0258722	0.00208235	0.00839563	0.00500481	0.00413339	0.00306977	0.000571486	0.00933986	0.0116241	0.00575733	0.0232766	0.000606188	0.000602305	0.000703498	0.000860263	0.00809084	0.0190051	0.00153877	0.00759579	0.000449666	0.000209424	0.000475632	0.00120801	0.00479272	0.000857351	0.00545642	0.0350893	0.00683405	0.00434597	0.022377	0.0145332	0.00129464	0.000452093	8.12942e-05	0.000845703
RO-24h	0.00125177	0.000827196	0.00918718	0.00307156	0.000868656	0.00167856	0.00783897	0.00223438	0.000364046	0.000352739	0.00188408	0.000552721	0.000138568	0.000742725	0.0505871	0.00311989	0.0115233	0.00747669	0.00521526	0.0032201	0.000685303	0.012031	0.0159453	0.0080283	0.0342223	0.00104691	0.00108327	0.000894818	0.00101809	0.00969556	0.0295944	0.00227496	0.0110003	0.000643621	0.00051237	0.000568905	0.00147592	0.00523677	0.000912333	0.00496939	0.0378331	0.00772811	0.0042945	0.022699	0.0155017	0.00175793	0.000413709	7.62679e-05	0.000883954
RO-24h	0.000867769	0.000618568	0.00804094	0.0029913	0.00115976	0.00181846	0.00817663	0.00189273	0.000362273	0.000299751	0.00149188	0.000459603	4.10162e-05	0.000737848	0.0858122	0.00389942	0.0150088	0.009982	0.0069825	0.00531769	0.000816333	0.0171046	0.0194581	0.0132269	0.0339485	0.000820102	0.000385995	0.000711686	0.001105	0.0124507	0.0190905	0.00109502	0.0119007	0.000666014	0.000214171	0.000778642	0.00153622	0.00580589	0.00103316	0.00441312	0.038165	0.00869676	0.00418742	0.0197172	0.0175647	0.0013471	0.000395529	7.07252e-05	0.00100545
RO-24h	0.00072654	0.000426125	0.00623002	0.00233548	0.000737626	0.00172445	0.00640695	0.00134777	0.000287778	0.000206633	0.00129545	0.000301524	0.000110855	0.000573339	0.065049	0.00298975	0.0119144	0.0073532	0.00636504	0.00367017	0.000536979	0.0150851	0.0139796	0.00971839	0.0232134	0.000619455	0.00024521	0.000662023	0.00077709	0.00845022	0.0106842	0.000581099	0.00805358	0.000496406	0.000121053	0.00052545	0.00124623	0.0045896	0.000733192	0.00481219	0.0367217	0.00686056	0.00410361	0.0208903	0.0137874	0.00119945	0.000375575	8.71316e-05	0.001058
Normoxia	0.000979032	0.000700009	0.00865819	0.00303672	0.00113526	0.00224667	0.00843354	0.00200999	0.00038154	0.000313567	0.00164517	0.000502776	0.000159123	0.000778902	0.08857	0.00408996	0.016775	0.010292	0.00418713	0.00192174	8.17903e-05	0.0101106	0.00738297	0.010672	0.0131344	0.000456644	0.000182747	0.000392237	0.00033563	0.00350718	0.0099207	0.000606184	0.00353281	0.000285486	9.78364e-05	0.000187873	0.00123867	0.00587709	0.000607299	0.00626086	0.046228	0.00650155	0.00468411	0.0260082	0.010875	0.00135901	0.000414077	9.11505e-05	0.00109826
Normoxia	0.000895682	0.000669031	0.00859266	0.00312653	0.00105325	0.00216488	0.00846051	0.00204766	0.000341202	0.000316464	0.00160639	0.000459318	0.000159792	0.00067126	0.0824166	0.00362151	0.0144325	0.00927551	0.00400126	0.00161241	0.000181187	0.0106243	0.00705871	0.00698717	0.0134098	0.000354796	0.000235788	0.000215507	0.000256514	0.00331953	0.00966708	0.000559606	0.00323261	0.000252503	0.000122797	0.000110985	0.00104745	0.00457469	0.000493416	0.00527492	0.0354676	0.0044695	0.00428274	0.0174454	0.00795238	0.00130196	0.000349002	5.8167e-05	0.000808543
Normoxia	0.000583007	0.000453078	0.00576722	0.00219229	0.000720735	0.00139133	0.00553767	0.00136748	0.000208376	0.000180295	0.00108066	0.000327384	8.98134e-05	0.000447507	0.0614878	0.00335474	0.0144472	0.00830896	0.00281675	0.00116579	0.000163581	0.00708679	0.00584589	0.0059444	0.0103863	0.000330059	0.000167146	0.000188987	0.000265651	0.00283971	0.00750621	0.000398254	0.00264871	0.000313567	3.01978e-05	0.000128814	0.000913065	0.00413409	0.000564286	0.00469503	0.0341995	0.00472133	0.00366474	0.0190632	0.00746476	0.00106617	0.000379311	7.66645e-05	0.000804977
Norm-12h	0.000843326	0.000701475	0.00888481	0.00288491	0.00108322	0.00212305	0.0082953	0.00179882	0.000355957	0.000296188	0.00144921	0.000374789	0.000129569	0.000647028	0.0861413	0.00495495	0.0171424	0.0104765	0.00809245	0.00488392	0.00061919	0.0189669	0.0174943	0.0200124	0.0316616	0.000721535	0.00023478	0.000551232	0.000687557	0.0104398	0.0186156	0.000917424	0.0109194	0.00057252	0.000142055	0.000708026	0.00157796	0.00687434	0.00109571	0.00482927	0.0476072	0.0115435	0.00459572	0.027035	0.0259223	0.00150489	0.00040406	7.0823e-05	0.00112478
Norm-12h	0.00130061	0.000861339	0.0103678	0.00318438	0.00117779	0.00260367	0.0095826	0.0023431	0.000399966	0.000331599	0.00160191	0.000443156	0.00013264	0.000843736	0.110155	0.00549329	0.0191492	0.0118856	0.00927986	0.00490214	0.000615505	0.0223905	0.0182996	0.0189527	0.0330862	0.000755719	0.000381134	0.000580708	0.000598311	0.00975966	0.0228337	0.00104044	0.0106351	0.000552665	0.000179104	0.000525851	0.00157325	0.00684486	0.000924998	0.00620807	0.0478424	0.0101353	0.00496171	0.0281978	0.0205465	0.00162381	0.000408563	7.30746e-05	0.00109632
Norm-12h	0.000905143	0.000665245	0.00701516	0.00256948	0.000778235	0.00180312	0.00698037	0.00163364	0.000290456	0.00025177	0.0012437	0.000345109	0.000124657	0.000583164	0.0720575	0.00600276	0.0222607	0.0113808	0.00746282	0.00383468	0.000512136	0.0188932	0.0157098	0.0169269	0.028642	0.000688375	0.000344085	0.000500674	0.000679983	0.00842753	0.020736	0.00110492	0.00882033	0.000557373	0.000166823	0.00055594	0.00136897	0.00504972	0.000801979	0.00505279	0.0385154	0.00801119	0.00406557	0.0223834	0.0169052	0.00131882	0.000361689	9.27249e-05	0.00119969
Norm-24h	0.00103003	0.00107301	0.00962621	0.00318379	0.00101739	0.00242357	0.00862767	0.00232477	0.000403111	0.000327316	0.00194843	0.000435352	0.000136696	0.000740985	0.0727994	0.00569333	0.0174279	0.0094667	0.00900099	0.00334235	0.000435729	0.0239476	0.0178792	0.021935	0.0396817	0.000948386	0.000776243	0.000758143	0.000884657	0.00760764	0.0458994	0.0026453	0.0105188	0.000447419	0.00036559	0.000383879	0.00126552	0.00550026	0.000799434	0.00500457	0.0362181	0.00942937	0.00405713	0.0217831	0.0161043	0.00179251	0.000408956	0.000104831	0.000819986
Norm-24h	0.00124403	0.00102116	0.00989583	0.00320735	0.00111431	0.00232439	0.00930889	0.00208324	0.000383502	0.000395946	0.00185246	0.000507565	0.000140844	0.000809993	0.10954	0.00551515	0.0179333	0.0109319	0.00847608	0.00429715	0.000535659	0.0235856	0.0194525	0.0216584	0.0376072	0.000852039	0.000386519	0.000534339	0.000750224	0.0086963	0.0303764	0.00128268	0.0108655	0.000398586	0.000186472	0.000427245	0.00118218	0.0046684	0.000774546	0.00486957	0.032885	0.0068412	0.00405883	0.0181743	0.0128847	0.00120179	0.000339383	6.31629e-05	0.000826774
Norm-24h	0.00107641	0.000689324	0.00838595	0.00282856	0.0011441	0.00195202	0.00765647	0.00184869	0.000330521	0.000292246	0.00151497	0.000371435	0.000132548	0.000716474	0.0885711	0.00625463	0.0221509	0.0113442	0.0119489	0.00441518	0.000517747	0.0323863	0.0203119	0.0211381	0.0364476	0.000722319	0.000321094	0.000540372	0.000616733	0.00983323	0.0271065	0.00118539	0.0101234	0.000417063	0.000137827	0.000434598	0.00169993	0.00580815	0.000865802	0.00696092	0.0386745	0.00739345	0.00543974	0.0203603	0.0147322	0.00206797	0.000451379	0.00012444	0.000825454
[truncated: 464 more columns]

## Sheet: Saturation-TAG
FC(Hypox-Normoxia)	SFA(0)	SFA(1,2)	SFA(3)	FC(RO-30h-Normoxia)	SFA(0)	SFA(1,2)	SFA(3)	FC(RO-1h - Normoxia)	SFA(0)	SFA(1,2)	SFA(3)	FC(RO-12h - Norm-12h)	SFA(0)	SFA(1,2)	SFA(3)	FC(RO-24h - Norm-24h)	SFA(0)	SFA(1,2)	SFA(3)
3.12375			3.12375	3.24102			3.24102	3.47305			3.47305	1.76486			1.76486	0.880074			0.880074
2.07615			2.07615	2.12112			2.12112	2.32799			2.32799	1.63311			1.63311	0.896179			0.896179
1.58675			1.58675	1.75624			1.75624	1.82517			1.82517	1.3723			1.3723	0.959061			0.959061
1.61608			1.61608	1.74777			1.74777	1.849			1.849	1.35587			1.35587	0.905594			0.905594
1.90091			1.90091	1.97401			1.97401	2.11046			2.11046	1.5144			1.5144	0.969955			0.969955
1.37409		1.37409		1.48127		1.48127		1.44124		1.44124		2.05712		2.05712		1.29541		1.29541
1.3521		1.3521		1.39984		1.39984		1.54304		1.54304		1.79448		1.79448		1.26048		1.26048
1.66842		1.66842		1.9328		1.9328		1.84643		1.84643		1.65107		1.65107		1.03794		1.03794
1.44968		1.44968		1.59936		1.59936		1.79363		1.79363		2.09016		2.09016		1.2156		1.2156
1.51986			1.51986	1.66907			1.66907	1.72684			1.72684	1.30992			1.30992	0.993927			0.993927
1.11509			1.11509	1.23694			1.23694	1.28337			1.28337	1.0252			1.0252	0.771359			0.771359
1.24904			1.24904	1.36992			1.36992	1.44589			1.44589	1.13135			1.13135	0.866459			0.866459
2.45696			2.45696	2.76246			2.76246	2.94887			2.94887	1.30053			1.30053	0.949608			0.949608
1.24324		1.24324		1.27838		1.27838		1.32883		1.32883		1.69421		1.69421		1.25078		1.25078
0.972044		0.972044		1.04354		1.04354		1.04766		1.04766		1.58158		1.58158		1.15262		1.15262
1.03943		1.03943		1.07385		1.07385		1.08069		1.08069		1.56266		1.56266		1.13233		1.13233
1.1646		1.1646		1.24071		1.24071		1.26726		1.26726		1.62104		1.62104		1.21414		1.21414
1.12636		1.12636		1.17211		1.17211		1.16921		1.16921		1.57505		1.57505		1.20445		1.20445
1.28549		1.28549		1.42592		1.42592		1.43339		1.43339		1.77965		1.77965		1.15311		1.15311
1.00956		1.00956		1.10724		1.10724		1.08094		1.08094		2.4639		2.4639		1.85546		1.85546
0.856371		0.856371		0.889189		0.889189		0.946332		0.946332		2.24385		2.24385		1.49905		1.49905
1.66268		1.66268		1.66877		1.66877		1.57127		1.57127		2.2047		2.2047		2.18365		2.18365
1.04922		1.04922		1.09506		1.09506		1.09154		1.09154		2.38968		2.38968		1.64045		1.64045
1.57143		1.57143		1.60565		1.60565		1.59966		1.59966		1.99904		1.99904		1.39127		1.39127
1.06151			1.06151	1.15895			1.15895	1.23497			1.23497	0.736697			0.736697	0.512967			0.512967
0.999837			0.999837	1.11688			1.11688	1.10219			1.10219	0.776515			0.776515	0.594172			0.594172
1.11448			1.11448	1.16832			1.16832	1.19988			1.19988	0.790698			0.790698	0.535613			0.535613
1.01438		1.01438		1.08441		1.08441		1.09597		1.09597		1.1427		1.1427		0.817022		0.817022
1.31647		1.31647		1.36473		1.36473		1.38232		1.38232		1.25977		1.25977		0.892656		0.892656
1.67638		1.67638		1.68675		1.68675		1.76057		1.76057		1.39064		1.39064		1.12996		1.12996
1.79293			1.79293	1.97861			1.97861	2.01129			2.01129	1.32148			1.32148	0.909245			0.909245
1.00057			1.00057	1.09947			1.09947	1.13004			1.13004	0.920891			0.920891	0.793729			0.793729
0.910594			0.910594	0.999249			0.999249	1.05409			1.05409	0.882878			0.882878	0.778173			0.778173
1.86155			1.86155	2.07674			2.07674	2.20649			2.20649	1.09377			1.09377	0.732452			0.732452
1.2173		1.2173		1.33118		1.33118		1.32273		1.32273		1.64264		1.64264		1.20445		1.20445
0.833578		0.833578		0.898807		0.898807		0.88578		0.88578		1.3199		1.3199		1.04257		1.04257
0.940078		0.940078		0.962646		0.962646		0.95642		0.95642		1.32642		1.32642		1.20762		1.20762
0.845519		0.845519		0.902444		0.902444		0.908632		0.908632		1.3203		1.3203		1.0703		1.0703
0.843515		0.843515		0.894181		0.894181		0.876375		0.876375		1.31476		1.31476		1.08411		1.08411
1.62248		1.62248		1.65692		1.65692		1.69591		1.69591		1.52309		1.52309		1.11068		1.11068
1.00782		1.00782		1.07786		1.07786		1.08005		1.08005		1.47511		1.47511		1.13119		1.13119
1.06278		1.06278		1.14286		1.14286		1.06096		1.06096		2.01203		2.01203		1.57751		1.57751
0.822088		0.822088		0.855635		0.855635		0.837919		0.837919		1.84742		1.84742		1.38644		1.38644
0.858615		0.858615		0.901546		0.901546		0.823125		0.823125		1.82734		1.82734		1.56348		1.56348
0.813225		0.813225		0.854801		0.854801		0.813043		0.813043		1.75987		1.75987		1.5		1.5
0.84991		0.84991		0.890664		0.890664		0.841293		0.841293		1.84721		1.84721		1.44809		1.44809
1.00316		1.00316		1.07021		1.07021		1.02783		1.02783		2.01938		2.01938		1.49008		1.49008
1.13937		1.13937		1.1309		1.1309		1.1256		1.1256		1.52668		1.52668		1.26754		1.26754
0.953164		0.953164		1.19378		1.19378		0.979085		0.979085		3.30802		3.30802		4.4359		4.4359
0.919023	0.919023			0.96958	0.96958			0.895673	0.895673			2.4041	2.4041			1.90739	1.90739
0.915208	0.915208			0.94835	0.94835			0.895265	0.895265			2.40958	2.40958			1.85772	1.85772
1.07989	1.07989			1.01786	1.01786			0.911466	0.911466			2.22412	2.22412			1.46704	1.46704
1.15307			1.15307	1.24213			1.24213	1.2528			1.2528	0.892425			0.892425	0.597519			0.597519
0.895291			0.895291	0.951801			0.951801	1.00886			1.00886	0.68884			0.68884	0.52666			0.52666
0.879893			0.879893	0.963664			0.963664	0.991821			0.991821	0.616149			0.616149	0.490647			0.490647
1.15774			1.15774	1.19643			1.19643	1.21528			1.21528	0.92562			0.92562	0.689798			0.689798
0.964039		0.964039		1.02282		1.02282		1		1		1.07909		1.07909		0.804867		0.804867
0.893626		0.893626		0.924441		0.924441		0.903335		0.903335		0.957812		0.957812		0.779745		0.779745
0.879143		0.879143		0.934884		0.934884		0.920154		0.920154		0.841839		0.841839		0.694269		0.694269
0.905418		0.905418		0.948907		0.948907		0.937975		0.937975		0.837362		0.837362		0.683042		0.683042
1.04163		1.04163		1.03547		1.03547		1.03392		1.03392		1.08512		1.08512		0.785427		0.785427
1.02357		1.02357		0.978801		0.978801		0.940586		0.940586		1.49908		1.49908		1.19937		1.19937
1.01861		1.01861		1.03537		1.03537		0.98635		0.98635		1.24799		1.24799		1.02358		1.02358
0.990934		0.990934		1.03895		1.03895		0.951981		0.951981		1.21744		1.21744		0.933821		0.933821
1.13837		1.13837		1.20074		1.20074		1.16607		1.16607		1.44157		1.44157		1.1806		1.1806
1.24136			1.24136	1.36028			1.36028	1.44644			1.44644	0.894684			0.894684	0.720334			0.720334
0.780205			0.780205	0.874967			0.874967	0.919452			0.919452	0.752284			0.752284	0.763764			0.763764
1.31188			1.31188	1.47147			1.47147	1.55155			1.55155	0.843287			0.843287	0.704644			0.704644
1.66015		1.66015		1.77281		1.77281		1.78845		1.78845		1.51677		1.51677		1.03189		1.03189
0.843017		0.843017		0.889399		0.889399		0.882773		0.882773		1.18136		1.18136		0.968111		0.968111
1.0868		1.0868		1.18283		1.18283		1.17544		1.17544		1.20896		1.20896		1.07546		1.07546
0.703728		0.703728		0.752209		0.752209		0.744667		0.744667		1.07172		1.07172		1.01633		1.01633
0.7664		0.7664		0.797333		0.797333		0.7984		0.7984		1.09349		1.09349		1.0537		1.0537
1.17934		1.17934		1.20607		1.20607		1.23242		1.23242		1.22169		1.22169		0.935365		0.935365
0.805838		0.805838		0.84835		0.84835		0.825508		0.825508		1.20069		1.20069		1.00722		1.00722
1.02883		1.02883		1.10721		1.10721		1.06396		1.06396		1.73397		1.73397		1.41994		1.41994
0.804078		0.804078		0.842427		0.842427		0.786019		0.786019		1.58535		1.58535		1.30671		1.30671
0.863081		0.863081		0.893643		0.893643		0.825489		0.825489		1.63936		1.63936		1.34762		1.34762
0.75225		0.75225		0.776417		0.776417		0.717583		0.717583		1.52028		1.52028		1.32904		1.32904
0.776627		0.776627		0.800296		0.800296		0.744453		0.744453		1.55429		1.55429		1.3223		1.3223
1.04631		1.04631		1.07454		1.07454		1.08277		1.08277		1.59432		1.59432		1.27086		1.27086
0.825465		0.825465		0.869814		0.869814		0.815451		0.815451		1.60447		1.60447		1.30405		1.30405
0.940954		0.940954		1.09424		1.09424		1.01063		1.01063		1.38697		1.38697		1.14971		1.14971
1.16571		1.16571		1.47649		1.47649		1.39779		1.39779		2.26529		2.26529		1.80304		1.80304
0.870234		0.870234		0.906887		0.906887		0.94295		0.94295		1.71172		1.71172		1.49737		1.49737
0.952973	0.952973			0.941622	0.941622			0.826486	0.826486			1.99249	1.99249			1.64739	1.64739
0.91066		0.91066		0.881902		0.881902		0.836656		0.836656		1.62156		1.62156		1.40035		1.40035
0.912042	0.912042			0.938089	0.938089			0.832461	0.832461			2.02104	2.02104			1.62365	1.62365
0.86485	0.86485			0.957978	0.957978			0.853492	0.853492			2.10936	2.10936			1.67602	1.67602
0.981875		0.981875		1.00187		1.00187		0.916562		0.916562		1.969		1.969		1.71932		1.71932
0.969487		0.969487		1.12372		1.12372		1.08449		1.08449		1.42026		1.42026		2.51023		2.51023
0.938001	0.938001			1.10357	1.10357			0.956966	0.956966			2.31492	2.31492			1.91379	1.91379
1.03476			1.03476	1.14941			1.14941	1.20118			1.20118	0.814551			0.814551	0.564315			0.564315
0.955788			0.955788	1.05627			1.05627	1.08682			1.08682	0.676874			0.676874	0.523918			0.523918
0.980006			0.980006	1.06317			1.06317	1.10432			1.10432	0.805903			0.805903	0.623427			0.623427
1.17765			1.17765	1.25342			1.25342	1.31635			1.31635	0.719679			0.719679	0.518194			0.518194
1.0326		1.0326		1.11083		1.11083		1.04814		1.04814		1.14357		1.14357		0.868073		0.868073
0.892169		0.892169		0.950476		0.950476		0.892657		0.892657		0.951707		0.951707		0.754255		0.754255
0.861806		0.861806		0.924374		0.924374		0.897715		0.897715		0.874729		0.874729		0.708452		0.708452
0.999815		0.999815		1.0672		1.0672		1.02851		1.02851		0.967579		0.967579		0.759618		0.759618
0.939476		0.939476		0.987127		0.987127		0.936766		0.936766		1.08967		1.08967		0.862862		0.862862
0.906149		0.906149		0.959547		0.959547		0.926241		0.926241		0.866755		0.866755		0.67759		0.67759
0.92609		0.92609		0.922395		0.922395		0.862528		0.862528		1.37871		1.37871		1.1255		1.1255
0.934484		0.934484		0.988048		0.988048		0.87915		0.87915		1.2096		1.2096		1.01964		1.01964
0.902246		0.902246		0.968736		0.968736		0.879568		0.879568		1.16107		1.16107		1.04041		1.04041
0.936451		0.936451		0.997889		0.997889		0.907316		0.907316		1.16412		1.16412		0.989023		0.989023
0.981559		0.981559		1.05365		1.05365		0.958089		0.958089		1.3785		1.3785		1.15084		1.15084
0.927749		0.927749		0.981583		0.981583		0.893572		0.893572		1.18214		1.18214		0.975906		0.975906
0.968868		0.968868		1.03071		1.03071		1.06437		1.06437		0.943		0.943		0.781439		0.781439
0.978874		0.978874		1.16248		1.16248		1.00708		1.00708		1.20811		1.20811		1.17266		1.17266
0.992188		0.992188		1.06889		1.06889		1.03977		1.03977		1.10784		1.10784		1.00542		1.00542
0.962696	0.962696			1.0585	1.0585			0.920729	0.920729			1.48077	1.48077			1.33828	1.33828
0.9566		0.9566		1.04461		1.04461		0.973478		0.973478		1.2852		1.2852		1.09521		1.09521
0.704643		0.704643		0.840226		0.840226		1.18767		1.18767		0.517075		0.517075		0.800559		0.800559
1.65965			1.65965	1.80155			1.80155	1.88636			1.88636	1.05034			1.05034	0.735568			0.735568
0.977266			0.977266	1.07417			1.07417	1.12987			1.12987	0.719121			0.719121	0.702791			0.702791
1.10989			1.10989	1.21758			1.21758	1.30286			1.30286	0.731375			0.731375	0.673516			0.673516
1.09888		1.09888		1.17327		1.17327		1.17139		1.17139		1.1459		1.1459		0.908562		0.908562
0.707213		0.707213		0.752561		0.752561		0.753841		0.753841		0.977148		0.977148		0.945157		0.945157
0.910489		0.910489		0.985722		0.985722		0.954421		0.954421		1.05051		1.05051		0.984462		0.984462
0.982176		0.982176		1.0505		1.0505		1.04864		1.04864		1.02033		1.02033		0.90391		0.90391
0.725502		0.725502		0.779518		0.779518		0.75241		0.75241		1.04433		1.04433		0.981319		0.981319
1.13205		1.13205		1.20259		1.20259		1.23163		1.23163		1.26619		1.26619		1.13683		1.13683
0.776178		0.776178		0.806159		0.806159		0.751359		0.751359		1.38369		1.38369		1.13911		1.13911
1.01372		1.01372		1.07088		1.07088		0.990854		0.990854		1.47162		1.47162		1.27119		1.27119
0.721043		0.721043		0.749212		0.749212		0.702754		0.702754		1.2864		1.2864		1.21149		1.21149
0.776269		0.776269		0.801465		0.801465		0.735704		0.735704		1.34835		1.34835		1.22564		1.22564
0.960101		0.960101		0.99466		0.99466		0.943192		0.943192		1.35419		1.35419		1.23281		1.23281
0.743391		0.743391		0.782502		0.782502		0.720769		0.720769		1.37377		1.37377		1.20011		1.20011
0.873039		0.873039		0.894437		0.894437		0.909415		0.909415		1.20323		1.20323		1.16301		1.16301
1.44191		1.44191		1.49911		1.49911		1.68314		1.68314		1.46022		1.46022		1.58757		1.58757
0.974074		0.974074		1.00483		1.00483		0.908535		0.908535		1.45341		1.45341		1.31652		1.31652
0.845043	0.845043			0.895573	0.895573			0.79692	0.79692			1.71283	1.71283			1.51885	1.51885
0.833937		0.833937		0.828502		0.828502		0.793478		0.793478		1.43806		1.43806		1.35333		1.35333
0.886335	0.886335			0.913043	0.913043			0.812733	0.812733			1.76318	1.76318			1.50048	1.50048
1.15286		1.15286		1.08868		1.08868		1.07001		1.07001		1.80702		1.80702		1.47161		1.47161
0.868065	0.868065			0.898368	0.898368			0.812587	0.812587			1.74274	1.74274			1.51004	1.51004
0.828522		0.828522		0.862009		0.862009		0.792148		0.792148		1.48885		1.48885		1.36342		1.36342
0.876543		0.876543		0.9851		0.9851		0.957003		0.957003		1.43381		1.43381		1.50686		1.50686
1.31519		1.31519		1.39685		1.39685		1.50287		1.50287		1.38151		1.38151		1.28301		1.28301
0.997862		0.997862		1.00428		1.00428		1.01782		1.01782		1.70449		1.70449		1.57859		1.57859
1.00349	1.00349			1.03828	1.03828			0.926585	0.926585			1.39784	1.39784			2.38598	2.38598
0.796394		0.796394		0.884411		0.884411		0.853128		0.853128		1.86804		1.86804		1.62391		1.62391
0.918843	0.918843			0.900547	0.900547			0.853792	0.853792			1.83359	1.83359			1.65707	1.65707
0.871378	0.871378			0.979505	0.979505			0.902827	0.902827			1.73687	1.73687			1.59667	1.59667
0.981182	0.981182			0.912512	0.912512			0.83757	0.83757			2.19054	2.19054			1.96228	1.96228
0.783974		0.783974		0.8791		0.8791		0.705717		0.705717		1.88509		1.88509		1.88044		1.88044
1.0804		1.0804		1.01621		1.01621		0.973155		0.973155		1.98149		1.98149		2.28934		2.28934
1.17656		1.17656		1.15733		1.15733		1.14437		1.14437		1.82475		1.82475		1.51193		1.51193
1.16806		1.16806		1.16085		1.16085		1.03942		1.03942		2.8568		2.8568		2.30235		2.30235
1.16922		1.16922		1.16298		1.16298		1.17913		1.17913		1.18069		1.18069		1.43472		1.43472
0.969099	0.969099			0.958798	0.958798			0.82867	0.82867			1.84046	1.84046			2.85421	2.85421
1.15544			1.15544	1.2414			1.2414	1.28299			1.28299	0.838832			0.838832	0.597502			0.597502
1.20756			1.20756	1.31816			1.31816	1.29176			1.29176	0.876888			0.876888	0.683666			0.683666
1.26958			1.26958	1.36052			1.36052	1.39773			1.39773	0.833922			0.833922	0.606113			0.606113
1.02186		1.02186		1.1004		1.1004		1.02186		1.02186		1.09113		1.09113		0.849759		0.849759
0.909009		0.909009		0.981982		0.981982		0.941441		0.941441		0.972285		0.972285		0.774049		0.774049
0.894293		0.894293		0.966264		0.966264		0.901181		0.901181		1.04809		1.04809		0.871618		0.871618
1.03754		1.03754		1.10731		1.10731		1.06116		1.06116		1.05241		1.05241		0.853366		0.853366
0.908053		0.908053		0.97231		0.97231		0.911752		0.911752		0.995183		0.995183		0.782738		0.782738
0.870831		0.870831		0.92015		0.92015		0.840301		0.840301		1.21672		1.21672		1.0148		1.0148
0.847318		0.847318		0.900585		0.900585		0.821637		0.821637		1.13122		1.13122		1.06139		1.06139
0.96233		0.96233		1.00837		1.00837		0.902729		0.902729		1.31888		1.31888		1.07406		1.07406
0.915201		0.915201		0.950614		0.950614		0.88292		0.88292		1.33548		1.33548		1.14095		1.14095
0.893325		0.893325		0.93087		0.93087		0.847437		0.847437		1.17045		1.17045		1.007		1.007
1.00442		1.00442		1.0571		1.0571		1.12814		1.12814		1.03505		1.03505		0.888525		0.888525
0.927139		0.927139		1.05682		1.05682		0.974599		0.974599		1.23779		1.23779		1.3215		1.3215
0.946589	0.946589			0.972081	0.972081			0.865744	0.865744			1.48585	1.48585			1.31786	1.31786
1.13857		1.13857		1.0553		1.0553		1.00266		1.00266		1.4034		1.4034		1.36857		1.36857
0.963833		0.963833		1.01843		1.01843		0.951394		0.951394		1.21358		1.21358		1.18496		1.18496
1.46218		1.46218		1.49664		1.49664		1.58438		1.58438		1.16687		1.16687		1.04164		1.04164
1.1779		1.1779		1.03706		1.03706		1.05364		1.05364		1.26653		1.26653		0.918922		0.918922
0.987055	0.987055			1.01387	1.01387			0.950532	0.950532			1.43441	1.43441			1.35519	1.35519
1.14466	1.14466			1.00395	1.00395			0.964427	0.964427			1.36635	1.36635			1.08759	1.08759
0.97648		0.97648		1.15093		1.15093		0.925541		0.925541		1.42241		1.42241		1.22955		1.22955
1.64516		1.64516		1.82638		1.82638		1.75901		1.75901		1.18795		1.18795		0.95831		0.95831
1.30632			1.30632	1.4267			1.4267	1.49583			1.49583	0.85251			0.85251	0.690309			0.690309
1.30823			1.30823	1.42722			1.42722	1.51392			1.51392	0.797197			0.797197	0.644889			0.644889
1.60765			1.60765	1.76144			1.76144	1.8162			1.8162	1.00197			1.00197	0.79177			0.79177
0.89208		0.89208		0.943773		0.943773		0.934704		0.934704		0.96074		0.96074		0.868279		0.868279
1.17244		1.17244		1.23196		1.23196		1.20587		1.20587		1.1454		1.1454		0.948844		0.948844
0.953609		0.953609		1.01833		1.01833		1.00543		1.00543		0.948219		0.948219		0.86058		0.86058
0.863973		0.863973		0.916006		0.916006		0.880613		0.880613		0.986427		0.986427		0.925627		0.925627
1.36607		1.36607		1.4394		1.4394		1.42822		1.42822		1.24321		1.24321		1.06719		1.06719
1.0086		1.0086		1.09465		1.09465		1.06692		1.06692		1.21435		1.21435		1.10792		1.10792
0.708668		0.708668		0.742228		0.742228		0.67449		0.67449		1.20172		1.20172		1.10366		1.10366
0.883256		0.883256		0.933023		0.933023		0.846047		0.846047		1.27733		1.27733		1.16428		1.16428
0.884567		0.884567		0.921372		0.921372		0.865328		0.865328		1.24779		1.24779		1.13093		1.13093
0.743674		0.743674		0.785823		0.785823		0.70625		0.70625		1.22723		1.22723		1.12891		1.12891
0.988235		0.988235		1.06134		1.06134		1.05882		1.05882		1.14408		1.14408		1.14013		1.14013
1.16267		1.16267		1.22036		1.22036		1.13235		1.13235		1.53234		1.53234		1.26887		1.26887
0.912826		0.912826		0.987229		0.987229		0.904498		0.904498		1.35249		1.35249		1.28394		1.28394
1.1792		1.1792		1.23434		1.23434		1.28195		1.28195		1.19778		1.19778		1.20034		1.20034
0.905312		0.905312		1.07217		1.07217		1.00058		1.00058		1.50183		1.50183		1.21562		1.21562
0.796969		0.796969		0.878118		0.878118		0.813388		0.813388		1.29107		1.29107		1.25972		1.25972
0.835028	0.835028			0.872881	0.872881			0.764407	0.764407			1.52303	1.52303			1.35387	1.35387
1.05167		1.05167		1.09909		1.09909		0.987906		0.987906		1.42079		1.42079		1.38745		1.38745
0.831609	0.831609			0.86647	0.86647			0.763365	0.763365			1.52769	1.52769			1.36395	1.36395
0.825554		0.825554		0.8462		0.8462		0.753441		0.753441		1.3805		1.3805		1.31237		1.31237
1.09445		1.09445		1.20868		1.20868		1.06315		1.06315		1.34897		1.34897		1.34501		1.34501
0.982272	0.982272			1.0076	1.0076			0.912882	0.912882			1.81166	1.81166			1.55289	1.55289
0.982387		0.982387		1.06497		1.06497		0.939335		0.939335		1.56981		1.56981		1.48564		1.48564
1.00041		1.00041		1.1374		1.1374		1.10646		1.10646		1.12175		1.12175		1.07227		1.07227
1.07326		1.07326		1.1752		1.1752		1.01486		1.01486		1.63402		1.63402		1.20897		1.20897
0.881362		0.881362		0.877969		0.877969		0.821534		0.821534		1.3745		1.3745		1.35552		1.35552
0.907178	0.907178			0.93524	0.93524			0.832164	0.832164			1.59444	1.59444			1.56535	1.56535
1.00358		1.00358		1.10448		1.10448		1.06507		1.06507		1.67449		1.67449		1.54525		1.54525
0.872524	0.872524			0.916021	0.916021			0.818691	0.818691			1.56954	1.56954			1.53529	1.53529
0.911942	0.911942			0.923402	0.923402			0.794331	0.794331			1.65107	1.65107			1.60445	1.60445
0.873889		0.873889		0.91145		0.91145		0.819633		0.819633		1.62481		1.62481		1.51957		1.51957
0.869315	0.869315			0.865144	0.865144			0.775869	0.775869			1.42462	1.42462			3.56778	3.56778
1.00503		1.00503		1.09921		1.09921		1.00735		1.00735		1.4017		1.4017		1.23877		1.23877
0.948304		0.948304		0.963074		0.963074		0.982768		0.982768		1.09979		1.09979		1.13488		1.13488
1.08384		1.08384		1.16559		1.16559		1.05465		1.05465		1.67884		1.67884		1.82625		1.82625
1.13585		1.13585		1.09706		1.09706		1.06324		1.06324		1.59685		1.59685		1.59609		1.59609
0.924207	0.924207			0.992116	0.992116			0.892134	0.892134			1.58453	1.58453			1.64311	1.64311
0.922244	0.922244			0.96052	0.96052			0.791286	0.791286			1.77211	1.77211			1.73413	1.73413
0.866578	0.866578			0.887592	0.887592			0.77485	0.77485			1.78156	1.78156			1.7051	1.7051
0.96008	0.96008			1.0845	1.0845			0.873586	0.873586			1.8848	1.8848			1.91099	1.91099
0.969625		0.969625		0.962031		0.962031		0.929046		0.929046		1.58084		1.58084		1.42438		1.42438
0.886185		0.886185		1.0587		1.0587		0.983536		0.983536		1.05769		1.05769		0.99287		0.99287
1.19531		1.19531		1.23787		1.23787		1.15027		1.15027		1.6556		1.6556		1.60581		1.60581
1.0543		1.0543		1.21807		1.21807		1.13705		1.13705		1.68259		1.68259		1.78093		1.78093
1.23342		1.23342		1.29838		1.29838		1.34008		1.34008		1.04753		1.04753		0.801223		0.801223
0.882997	0.882997			1.03086	1.03086			0.929574	0.929574			1.67442	1.67442			1.77097	1.77097
1.18041	1.18041			1.03007	1.03007			1.12371	1.12371			1.35544	1.35544			1.19901	1.19901
1.08339	1.08339			1.28002	1.28002			1.14563	1.14563			2.00557	2.00557			2.71685	2.71685
1.84446		1.84446		1.76262		1.76262		1.79745		1.79745		1.30165		1.30165		0.926151		0.926151
1.18375		1.18375		1.30937		1.30937		1.24125		1.24125		1.75745		1.75745		1.5313		1.5313
1.12862		1.12862		1.24289		1.24289		1.23473		1.23473		0.79739		0.79739		0.609058		0.609058
0.948908	0.948908			1.04633	1.04633			0.953672	0.953672			1.01365	1.01365			0.763085	0.763085
1.15565		1.15565		1.26444		1.26444		1.08536		1.08536		1.89055		1.89055		1.79597		1.79597
1.09679	1.09679			1.16313	1.16313			1.10169	1.10169			1.17141	1.17141			0.923372	0.923372
1.21967			1.21967	1.27331			1.27331	1.2433			1.2433	1.2133			1.2133	0.945463			0.945463
1.03647		1.03647		1.1129		1.1129		1.10379		1.10379		1.17696		1.17696		0.961179		0.961179
1.07885		1.07885		1.15369		1.15369		1.06479		1.06479		1.06327		1.06327		0.886421		0.886421
1.14911		1.14911		1.18297		1.18297		1.18468		1.18468		1.11104		1.11104		0.880824		0.880824
0.998407		0.998407		1.07839		1.07839		1.02326		1.02326		1.16473		1.16473		0.901686		0.901686
0.956842		0.956842		0.909212		0.909212		0.857108		0.857108		1.28364		1.28364		1.26661		1.26661
0.846277		0.846277		0.897251		0.897251		0.794502		0.794502		1.24628		1.24628		1.04475		1.04475
0.899728		0.899728		0.95277		0.95277		0.844505		0.844505		1.22995		1.22995		1.05572		1.05572
1.23791		1.23791		1.26654		1.26654		1.21224		1.21224		1.3677		1.3677		0.9908		0.9908
1.00757		1.00757		1.04139		1.04139		1.053		1.053		1.19129		1.19129		1.14156		1.14156
0.968429		0.968429		1.05021		1.05021		0.910232		0.910232		1.35788		1.35788		1.17539		1.17539
0.978348		0.978348		1.07828		1.07828		0.878081		0.878081		1.36616		1.36616		1.10968		1.10968
1.11081		1.11081		1.1317		1.1317		1.04133		1.04133		1.06073		1.06073		1.06429		1.06429
1.17166		1.17166		1.0995		1.0995		1.18904		1.18904		1.82763		1.82763		1.45753		1.45753
1.10821		1.10821		1.10435		1.10435		1.10007		1.10007		1.22093		1.22093		1.28786		1.28786
0.874346		0.874346		1.18612		1.18612		0.750887		0.750887		2.48083		2.48083		1.70225		1.70225
1.69136		1.69136		1.79894		1.79894		1.86508		1.86508		1.73463		1.73463		1.02899		1.02899
1.5761		1.5761		1.64088		1.64088		1.55346		1.55346		1.54966		1.54966		1.21082		1.21082
2.35631			2.35631	2.57409			2.57409	2.70572			2.70572	1.42302			1.42302	1.00888			1.00888
1.615			1.615	1.74087			1.74087	1.83877			1.83877	0.952461			0.952461	0.70045			0.70045
1.41711		1.41711		1.50835		1.50835		1.45784		1.45784		1.31127		1.31127		0.989962		0.989962
1.1997		1.1997		1.26028		1.26028		1.26253		1.26253		1.01707		1.01707		0.809387		0.809387
1.10068		1.10068		1.15902		1.15902		1.10719		1.10719		1.08405		1.08405		0.883032		0.883032
1.24851		1.24851		1.32937		1.32937		1.32025		1.32025		1.13855		1.13855		0.981487		0.981487
1.12885		1.12885		1.21786		1.21786		1.19423		1.19423		1.17935		1.17935		1.06414		1.06414
0.961957		0.961957		0.980731		0.980731		0.891798		0.891798		1.27662		1.27662		1.21614		1.21614
0.847905		0.847905		0.891166		0.891166		0.829235		0.829235		1.15945		1.15945		1.00395		1.00395
0.838169		0.838169		0.874207		0.874207		0.798957		0.798957		1.1723		1.1723		1.04489		1.04489
1.31666		1.31666		1.32934		1.32934		1.34801		1.34801		1.42702		1.42702		1.17488		1.17488
1.06588		1.06588		1.08808		1.08808		1.03997		1.03997		1.38303		1.38303		1.24575		1.24575
0.911176		0.911176		0.959956		0.959956		0.877685		0.877685		1.28323		1.28323		1.21201		1.21201
1.24745		1.24745		1.39277		1.39277		1.19167		1.19167		1.37698		1.37698		1.01928		1.01928
0.979632		0.979632		1.04688		1.04688		0.996106		0.996106		1.22707		1.22707		1.11976		1.11976
0.966587	0.966587			0.96778	0.96778			0.877088	0.877088			1.58645	1.58645			1.40637	1.40637
0.961449		0.961449		1.02862		1.02862		0.9375		0.9375		1.37718		1.37718		1.21443		1.21443
0.79738	0.79738			0.829939	0.829939			0.724997	0.724997			1.33345	1.33345			1.21419	1.21419
0.943077		0.943077		0.96		0.96		0.869231		0.869231		1.34951		1.34951		1.26026		1.26026
1.2977		1.2977		1.31979		1.31979		1.30874		1.30874		1.32795		1.32795		1.32565		1.32565
0.88634	0.88634			0.959225	0.959225			0.813456	0.813456			1.55332	1.55332			1.41176	1.41176
0.922742		0.922742		0.988996		0.988996		0.901192		0.901192		1.44893		1.44893		1.35188		1.35188
1.09135		1.09135		1.17918		1.17918		1.12613		1.12613		1.18212		1.18212		1.03771		1.03771
0.93003		0.93003		1.02131		1.02131		0.894878		0.894878		1.29606		1.29606		1.25789		1.25789
0.898559	0.898559			0.944861	0.944861			0.820173	0.820173			1.56426	1.56426			1.50992	1.50992
1.06674		1.06674		1.09617		1.09617		1.08656		1.08656		1.38218		1.38218		1.23994		1.23994
0.856976	0.856976			0.909154	0.909154			0.791987	0.791987			1.40418	1.40418			1.39437	1.39437
0.851064	0.851064			0.907993	0.907993			0.757907	0.757907			1.44425	1.44425			1.50597	1.50597
0.991958		0.991958		1.15468		1.15468		0.941816		0.941816		1.45626		1.45626		1.42102		1.42102
0.901294	0.901294			0.982999	0.982999			0.836336	0.836336			1.36916	1.36916			1.46678	1.46678
0.904974	0.904974			0.942094	0.942094			0.845954	0.845954			1.67574	1.67574			1.542	1.542
0.975619		0.975619		0.976511		0.976511		0.923786		0.923786		1.34321		1.34321		1.31998		1.31998
1.03308		1.03308		0.994665		0.994665		1.02747		1.02747		1.22381		1.22381		1.08376		1.08376
0.94176		0.94176		1.02449		1.02449		1.16148		1.16148		1.2382		1.2382		1.38527		1.38527
0.966118		0.966118		1.02178		1.02178		0.968538		0.968538		1.48599		1.48599		1.53969		1.53969
1.01859	1.01859			1.1054	1.1054			0.957033	0.957033			1.61753	1.61753			1.31759	1.31759
1.38093		1.38093		1.50967		1.50967		1.48199		1.48199		1.61621		1.61621		1.36455		1.36455
0.899582	0.899582			0.948117	0.948117			0.842678	0.842678			1.57152	1.57152			1.44757	1.44757
0.866228	0.866228			1.06506	1.06506			0.883772	0.883772			1.54204	1.54204			1.3972	1.3972
0.967778	0.967778			0.95963	0.95963			0.88963	0.88963			1.62479	1.62479			1.48642	1.48642
0.916555	0.916555			0.971866	0.971866			0.876938	0.876938			1.64172	1.64172			1.44669	1.44669
0.865913		0.865913		0.94415		0.94415		0.844115		0.844115		1.28711		1.28711		1.39092		1.39092
1.33632		1.33632		1.42169		1.42169		1.48079		1.48079		1.11406		1.11406		1.00889		1.00889
1.14438		1.14438		1.28077		1.28077		1.18167		1.18167		1.49902		1.49902		1.46849		1.46849
1.09148		1.09148		1.16477		1.16477		1.10455		1.10455		1.42113		1.42113		1.43882		1.43882
1.03223		1.03223		1.10635		1.10635		1.04512		1.04512		1.48712		1.48712		1.41571		1.41571
0.930982	0.930982			1.0023	1.0023			0.917945	0.917945			1.62771	1.62771			1.62702	1.62702
1.04545	1.04545			1.05262	1.05262			0.942352	0.942352			1.66627	1.66627			1.5139	1.5139
0.975235	0.975235			1.01734	1.01734			0.945765	0.945765			1.52979	1.52979			1.53718	1.53718
1.14604		1.14604		1.20811		1.20811		1.24865		1.24865		1.22477		1.22477		1.07092		1.07092
1.03546		1.03546		1.0916		1.0916		1.00675		1.00675		1.60728		1.60728		1.53991		1.53991
1.12658		1.12658		1.24028		1.24028		1.1482		1.1482		1.51373		1.51373		1.39354		1.39354
0.99353	0.99353			1.07692	1.07692			0.981308	0.981308			1.61716	1.61716			1.64715	1.64715
1.02019	1.02019			1.06369	1.06369			1.03628	1.03628			1.2663	1.2663			1.17736	1.17736
1.43969	1.43969			1.52202	1.52202			1.59285	1.59285			1.67716	1.67716			1.2474	1.2474
1.04785	1.04785			1.07991	1.07991			0.924601	0.924601			1.84134	1.84134			1.61313	1.61313
1.09119		1.09119		1.1397		1.1397		1.05211		1.05211		1.65886		1.65886		1.68582		1.68582
1.13191	1.13191			1.17023	1.17023			1.04523	1.04523			1.72731	1.72731			1.94478	1.94478
1.19261		1.19261		1.19747		1.19747		1.20817		1.20817		1.3984		1.3984		1.20113		1.20113
1.12892	1.12892			1.19582	1.19582			1.07735	1.07735			1.37531	1.37531			1.19031	1.19031
0.936984	0.936984			0.972243	0.972243			0.900225	0.900225			1.29623	1.29623			1.16454	1.16454
0.853003	0.853003			0.875882	0.875882			0.805624	0.805624			1.3325	1.3325			1.26472	1.26472
0.931767	0.931767			0.958986	0.958986			0.89821	0.89821			1.36739	1.36739			1.1556	1.1556
1.15021	1.15021			1.14637	1.14637			1.08437	1.08437			1.39257	1.39257			1.27333	1.27333
1.40887	1.40887			1.48966	1.48966			1.26601	1.26601			1.52783	1.52783			1.19275	1.19275
1.04647		1.04647		0.960581		0.960581		0.984647		0.984647		1.17624		1.17624		1.20145		1.20145
1.1307		1.1307		1.22758		1.22758		1.08245		1.08245		1.39623		1.39623		1.21869		1.21869
2.21857		2.21857		2.47626		2.47626		2.36515		2.36515		1.869		1.869		1.34988		1.34988
1.86781		1.86781		1.97913		1.97913		1.90006		1.90006		1.61506		1.61506		1.18321		1.18321
1.45064		1.45064		1.56509		1.56509		1.40758		1.40758		1.71246		1.71246		1.4756		1.4756
1.10766		1.10766		1.19617		1.19617		1.07611		1.07611		1.29522		1.29522		1.19566		1.19566
1.01776		1.01776		1.07425		1.07425		0.97498		0.97498		1.31983		1.31983		1.14931		1.14931
1.08134		1.08134		1.12152		1.12152		1.02732		1.02732		1.28942		1.28942		1.19591		1.19591
1.51147		1.51147		1.60706		1.60706		1.46424		1.46424		1.63711		1.63711		1.46421		1.46421
1.01113		1.01113		1.12584		1.12584		1.05619		1.05619		1.36701		1.36701		1.19914		1.19914
0.918174	0.918174			0.944263	0.944263			0.856211	0.856211			1.37675	1.37675			1.28548	1.28548
1.10145		1.10145		1.24444		1.24444		1.12754		1.12754		1.74867		1.74867		1.47223		1.47223
1.2506		1.2506		1.26493		1.26493		1.09711		1.09711		1.51626		1.51626		1.64697		1.64697
0.879802	0.879802			0.921314	0.921314			0.807311	0.807311			1.31752	1.31752			1.2071	1.2071
0.920973		0.920973		1.05167		1.05167		0.929483		0.929483		1.57255		1.57255		1.24965		1.24965
1.1839		1.1839		1.22921		1.22921		1.18763		1.18763		1.49208		1.49208		1.54522		1.54522
1.02688		1.02688		1.05527		1.05527		0.971095		0.971095		1.42499		1.42499		1.21953		1.21953
0.906877	0.906877			0.965449	0.965449			0.836679	0.836679			1.38562	1.38562			1.37897	1.37897
1.0101	1.0101			1.12283	1.12283			0.808974	0.808974			1.27738	1.27738			1.97794	1.97794
0.960899	0.960899			1.06572	1.06572			0.930116	0.930116			1.22919	1.22919			3.20331	3.20331
0.875051	0.875051			0.968559	0.968559			0.790527	0.790527			1.51136	1.51136			1.17327	1.17327
0.954595		0.954595		1.03049		1.03049		0.923229		0.923229		1.40155		1.40155		1.24003		1.24003
1.14972		1.14972		1.15532		1.15532		1.17214		1.17214		1.08212		1.08212		1.18504		1.18504
1.2068		1.2068		1.12592		1.12592		1.11029		1.11029		1.24403		1.24403		1.11673		1.11673
1.18971		1.18971		1.2037		1.2037		1.14772		1.14772		1.58521		1.58521		1.45345		1.45345
1.2567		1.2567		1.35056		1.35056		1.30912		1.30912		1.55249		1.55249		1.43693		1.43693
0.908076	0.908076			0.92268	0.92268			0.830584	0.830584			1.37264	1.37264			1.43277	1.43277
0.881461	0.881461			1.0299	1.0299			0.830842	0.830842			1.31948	1.31948			1.44251	1.44251
0.98667		0.98667		0.996159		0.996159		0.888839		0.888839		1.2806		1.2806		1.19466		1.19466
0.910368		0.910368		0.99719		0.99719		0.901096		0.901096		1.36213		1.36213		1.10291		1.10291
1.25659		1.25659		1.32689		1.32689		1.25835		1.25835		1.54121		1.54121		1.4657		1.4657
1.02762		1.02762		1.11739		1.11739		1.00043		1.00043		1.48666		1.48666		1.47959		1.47959
1.36321		1.36321		1.37838		1.37838		1.33287		1.33287		1.64311		1.64311		1.53322		1.53322
0.947865	0.947865			1.01888	1.01888			0.875205	0.875205			1.45515	1.45515			1.60613	1.60613
0.817182	0.817182			0.875	0.875			0.847612	0.847612			1.35296	1.35296			1.26038	1.26038
1.13238		1.13238		1.14571		1.14571		1.19905		1.19905		1.53729		1.53729		0.95773		0.95773
0.989442	0.989442			1.0362	1.0362			0.986425	0.986425			1.61435	1.61435			1.38152	1.38152
1.03032		1.03032		1.10801		1.10801		0.978885		0.978885		1.58835		1.58835		1.57882		1.57882
1.31773		1.31773		1.43068		1.43068		1.35292		1.35292		1.57778		1.57778		1.37861		1.37861
1.1687		1.1687		1.26134		1.26134		1.20673		1.20673		1.31693		1.31693		1.0693		1.0693
1.05102	1.05102			1.16054	1.16054			0.973469	0.973469			1.58971	1.58971			1.56556	1.56556
1.41447		1.41447		1.52502		1.52502		1.49386		1.49386		1.60027		1.60027		1.11395		1.11395
0.991078	0.991078			1.0768	1.0768			0.979054	0.979054			1.54974	1.54974			1.5701	1.5701
1.31361	1.31361			1.2269	1.2269			1.19206	1.19206			1.48592	1.48592			1.17194	1.17194
1.04978	1.04978			1.12245	1.12245			0.957193	0.957193			1.57412	1.57412			1.70691	1.70691
1.04494		1.04494		1.11053		1.11053		0.999686		0.999686		1.56036		1.56036		1.54024		1.54024
1.29244		1.29244		1.37593		1.37593		1.26906		1.26906		1.33566		1.33566		1.1469		1.1469
1.14741	1.14741			1.19602	1.19602			1.08048	1.08048			1.55082	1.55082			1.42717	1.42717
1.06781	1.06781			1.1616	1.1616			0.987959	0.987959			1.53492	1.53492			1.21525	1.21525
1.23172	1.23172			1.2712	1.2712			0.946926	0.946926			1.29964	1.29964			1.14019	1.14019
1.07462	1.07462			1.1295	1.1295			0.992835	0.992835			1.62125	1.62125			1.65684	1.65684
1.12138	1.12138			1.15346	1.15346			1.09937	1.09937			1.74826	1.74826			1.44144	1.44144
1.19425		1.19425		1.24643		1.24643		1.11393		1.11393		1.45445		1.45445		1.26609		1.26609
0.906082	0.906082			0.889177	0.889177			0.885689	0.885689			1.42494	1.42494			2.94652	2.94652
1.57507		1.57507		1.67378		1.67378		1.50355		1.50355		1.96177		1.96177		1.5578		1.5578
1.14599	1.14599			1.2395	1.2395			1.0563	1.0563			1.70127	1.70127			1.4996	1.4996
0.986585	0.986585			1.10081	1.10081			0.93252	0.93252			1.4239	1.4239			1.73343	1.73343
1.64568		1.64568		1.72361		1.72361		1.54511		1.54511		1.66002		1.66002		1.09718		1.09718
1.28228		1.28228		1.35949		1.35949		1.24785		1.24785		1.53656		1.53656		1.58216		1.58216
1.08268	1.08268			1.09547	1.09547			1.01575	1.01575			1.53782	1.53782			1.55802	1.55802
0.926444	0.926444			1.07052	1.07052			0.952584	0.952584			1.38568	1.38568			1.4004	1.4004
1.2		1.2		1.25596		1.25596		1.14679		1.14679		1.65163		1.65163		1.67615		1.67615
1.88495		1.88495		1.97773		1.97773		2.03649		2.03649		1.34256		1.34256		0.909444		0.909444
1.41469		1.41469		1.53789		1.53789		1.41718		1.41718		1.71117		1.71117		1.30301		1.30301
1.05364	1.05364			1.11609	1.11609			0.990392	0.990392			1.50524	1.50524			1.49775	1.49775
0.996495	0.996495			1.07301	1.07301			0.925818	0.925818			1.53994	1.53994			1.59871	1.59871
1.25538		1.25538		1.3109		1.3109		1.1898		1.1898		1.5469		1.5469		1.47594		1.47594
1.07488	1.07488			1.11991	1.11991			1.02844	1.02844			1.46642	1.46642			1.31167	1.31167
1.04963	1.04963			1.19024	1.19024			1.06452	1.06452			1.67245	1.67245			2.05272	2.05272
0.995802	0.995802			1.04158	1.04158			0.908037	0.908037			1.42809	1.42809			1.48499	1.48499
1.21073	1.21073			1.24402	1.24402			1.14291	1.14291			1.51078	1.51078			1.36952	1.36952
1.0389	1.0389			1.14682	1.14682			0.934709	0.934709			1.66347	1.66347			1.64302	1.64302
0.995135	0.995135			1.24986	1.24986			0.968213	0.968213			1.30388	1.30388			1.26452	1.26452
1.18835	1.18835			1.26505	1.26505			1.14078	1.14078			1.5781	1.5781			2.68412	2.68412
1.14189	1.14189			1.14547	1.14547			1.11963	1.11963			1.47503	1.47503			1.67504	1.67504
1.18261	1.18261			1.20189	1.20189			1.10149	1.10149			1.7801	1.7801			1.59712	1.59712

## Sheet: SI-lipids
	SI-CE	SI-SM	SI-PC	SI-PE	SI-LPC	SI-LPE	SI-CER	SI-FFA	SI-DAG
Hypoxia	0.800157	17.9197	0.713411	0.698756	0.90421	1.71585	8.38135	4.13107	1.63712
Hypoxia	0.7911	20.8696	0.709017	0.703086	0.691313	1.42405	7.77842	2.98512	1.49474
Hypoxia	0.805894	19.1895	0.71926	0.705031	0.88012	1.79036	7.72483	4.05415	1.75148
RO-30m	0.780929	20.1277	0.70355	0.690289	0.697674	1.09828	6.36101	3.19588	1.49545
RO-30m	0.814179	18.8808	0.711927	0.691504	0.570703	1.16174	6.5369	3.02372	1.42953
RO-30m	0.790136	17.9276	0.717113	0.705423	0.905553	1.6936	6.6206	4.36145	1.55826
RO-60m	0.826319	19.8813	0.715495	0.711246	0.49222	1.16858	6.31597	3.3877	1.29476
RO-60m	0.791385	19.8654	0.727627	0.703257	0.428118	1.05279	7.51998	3.29258	1.2792
RO-60m	0.861217	22.0336	0.702121	0.72166	0.525247	1.18908	8.0833	1.93374	2.1481
RO-12h	0.714319	27.7876	0.613089	0.675005	0.436793	0.665482	8.42036	3.19678	1.13168
RO-12h	0.724498	27.0765	0.616673	0.675766	0.344064	0.479393	7.73713	2.72292	1.07818
RO-12h	0.731875	26.9627	0.608702	0.665384	0.352432	0.511775	7.26304	2.67209	1.03826
RO-24h	0.804047	30.8106	0.646789	0.651082	0.369074	0.698413	8.72449	2.5668	1.032
RO-24h	0.760073	31.7084	0.65369	0.651646	0.341532	0.726848	10.4909	2.29014	1.1547
RO-24h	0.76519	30.3431	0.65126	0.641969	0.372431	0.71787	10.8732	2.81865	1.28601
Normoxia	0.794792	25.0113	0.6637	0.667337	0.82719	1.25	10.633	3.83113	1.69497
Normoxia	0.778138	25.628	0.677825	0.672412	1.00767	1.26283	10.8318	3.8736	1.6021
Normoxia	0.779896	26.1138	0.677028	0.674397	0.944472	1.26887	9.54269	3.92315	1.50506
Norm-12h	0.840074	29.1561	0.683744	0.67651	0.326552	0.753224	10.3316	2.07404	1.38624
Norm-12h	0.864716	27.7948	0.69202	0.666794	0.405869	0.847839	11.3412	2.53625	1.44649
Norm-12h	0.796365	27.9538	0.679154	0.673622	0.363376	0.73942	8.81493	2.49281	1.4395
Norm-24h	0.836833	29.4924	0.677657	0.660448	0.359164	0.602331	10.1324	2.23742	1.46115
Norm-24h	0.834665	30.5236	0.680208	0.645722	0.350106	0.711775	12.1652	2.66716	1.47344
Norm-24h	0.844243	29.1026	0.690267	0.653501	0.34235	0.785239	10.3115	2.7387	1.65395
