# Supplementary figures and images for: Metabolomic and Lipidomic Analysis of the Colorectal Adenocarcinoma Cell Line HT29 in Hypoxia and Reoxygenation
Source: MDPI journal article supplement (doi:10.3390/metabo13070875), 2023-07-23

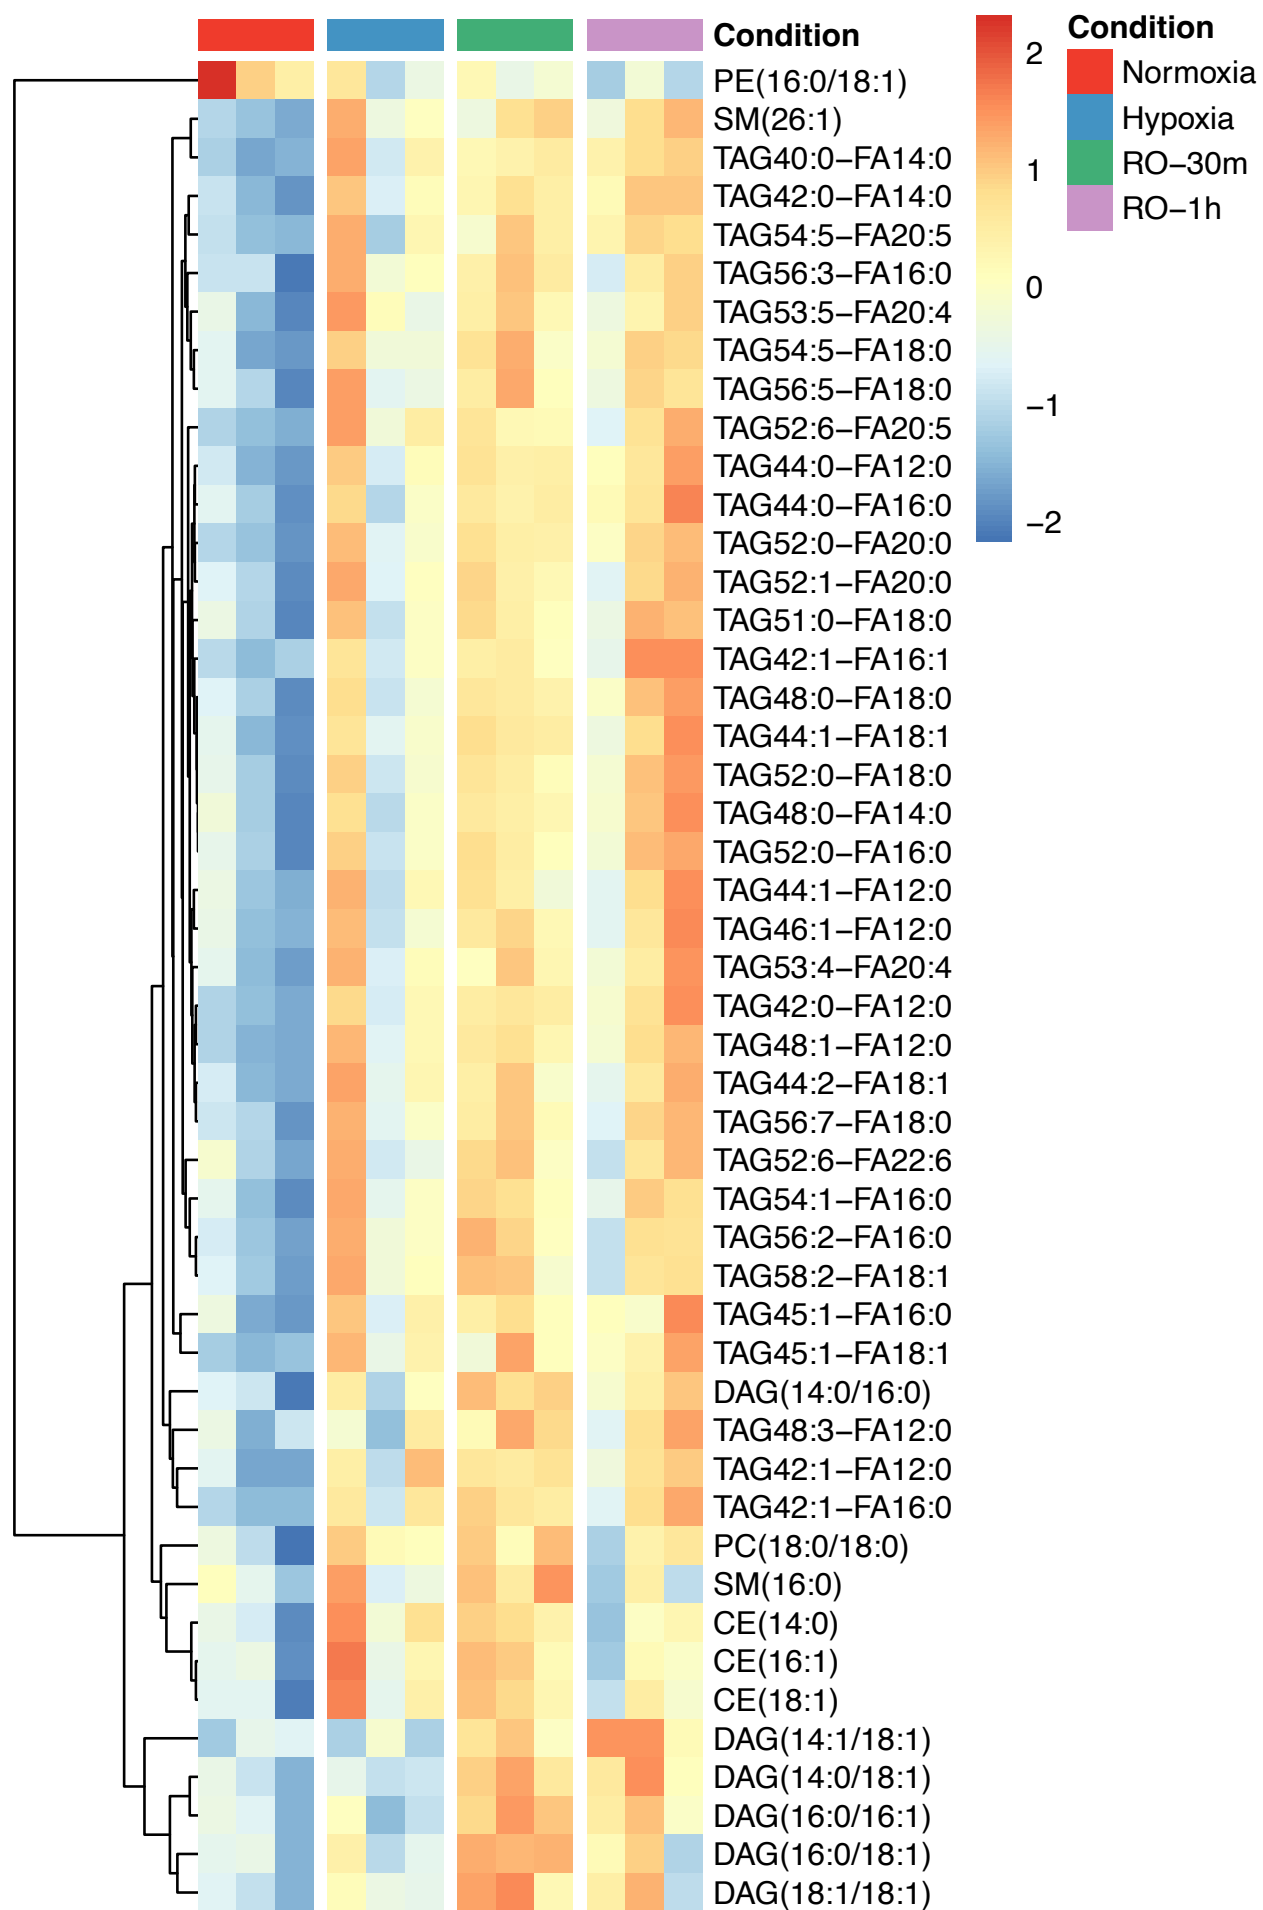

**Figure S2**

Supplement: s1 [file s1]

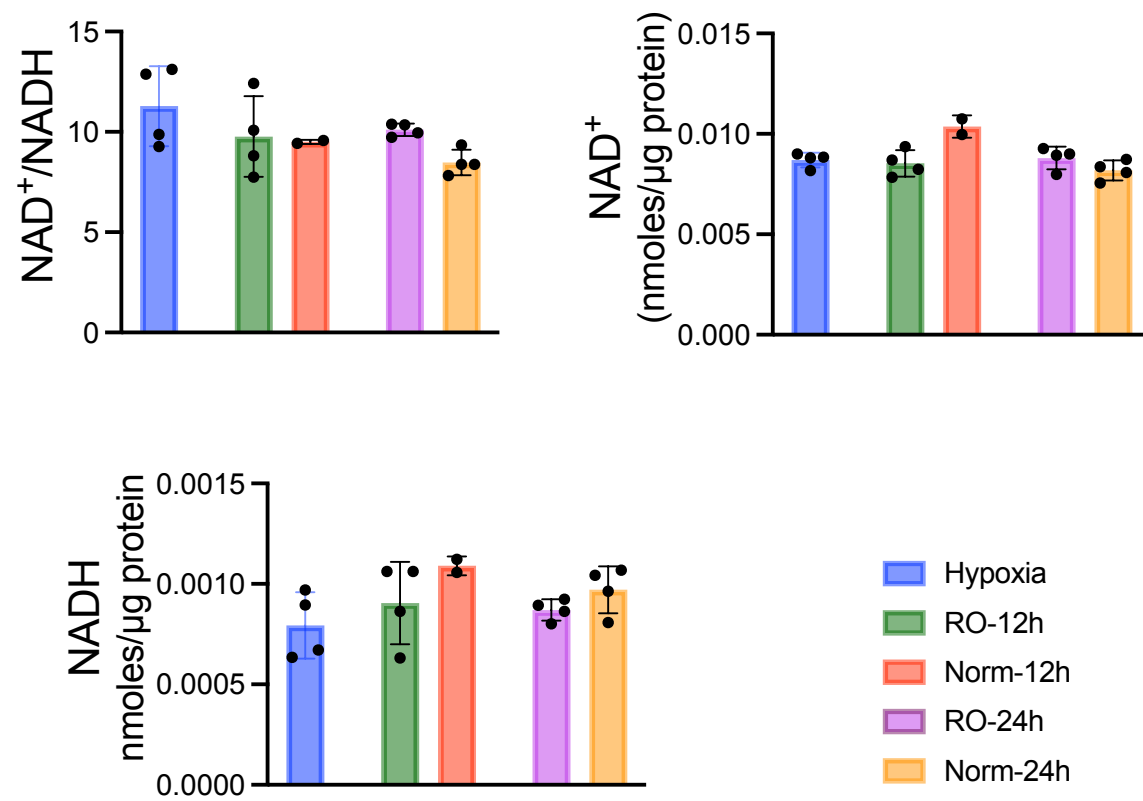

**Figure S6**

Supplement: s1 [file s1]

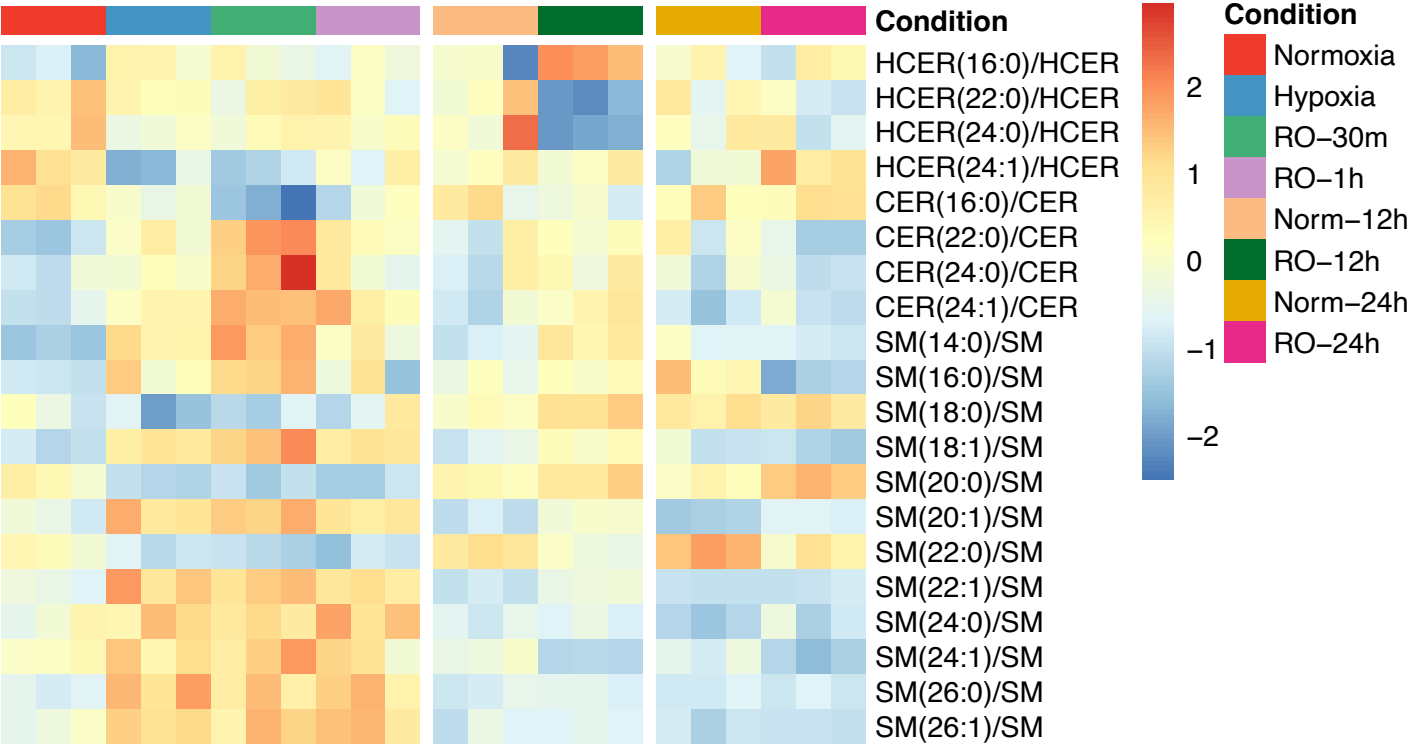

Figure S5

Supplement: s1 [file s1]

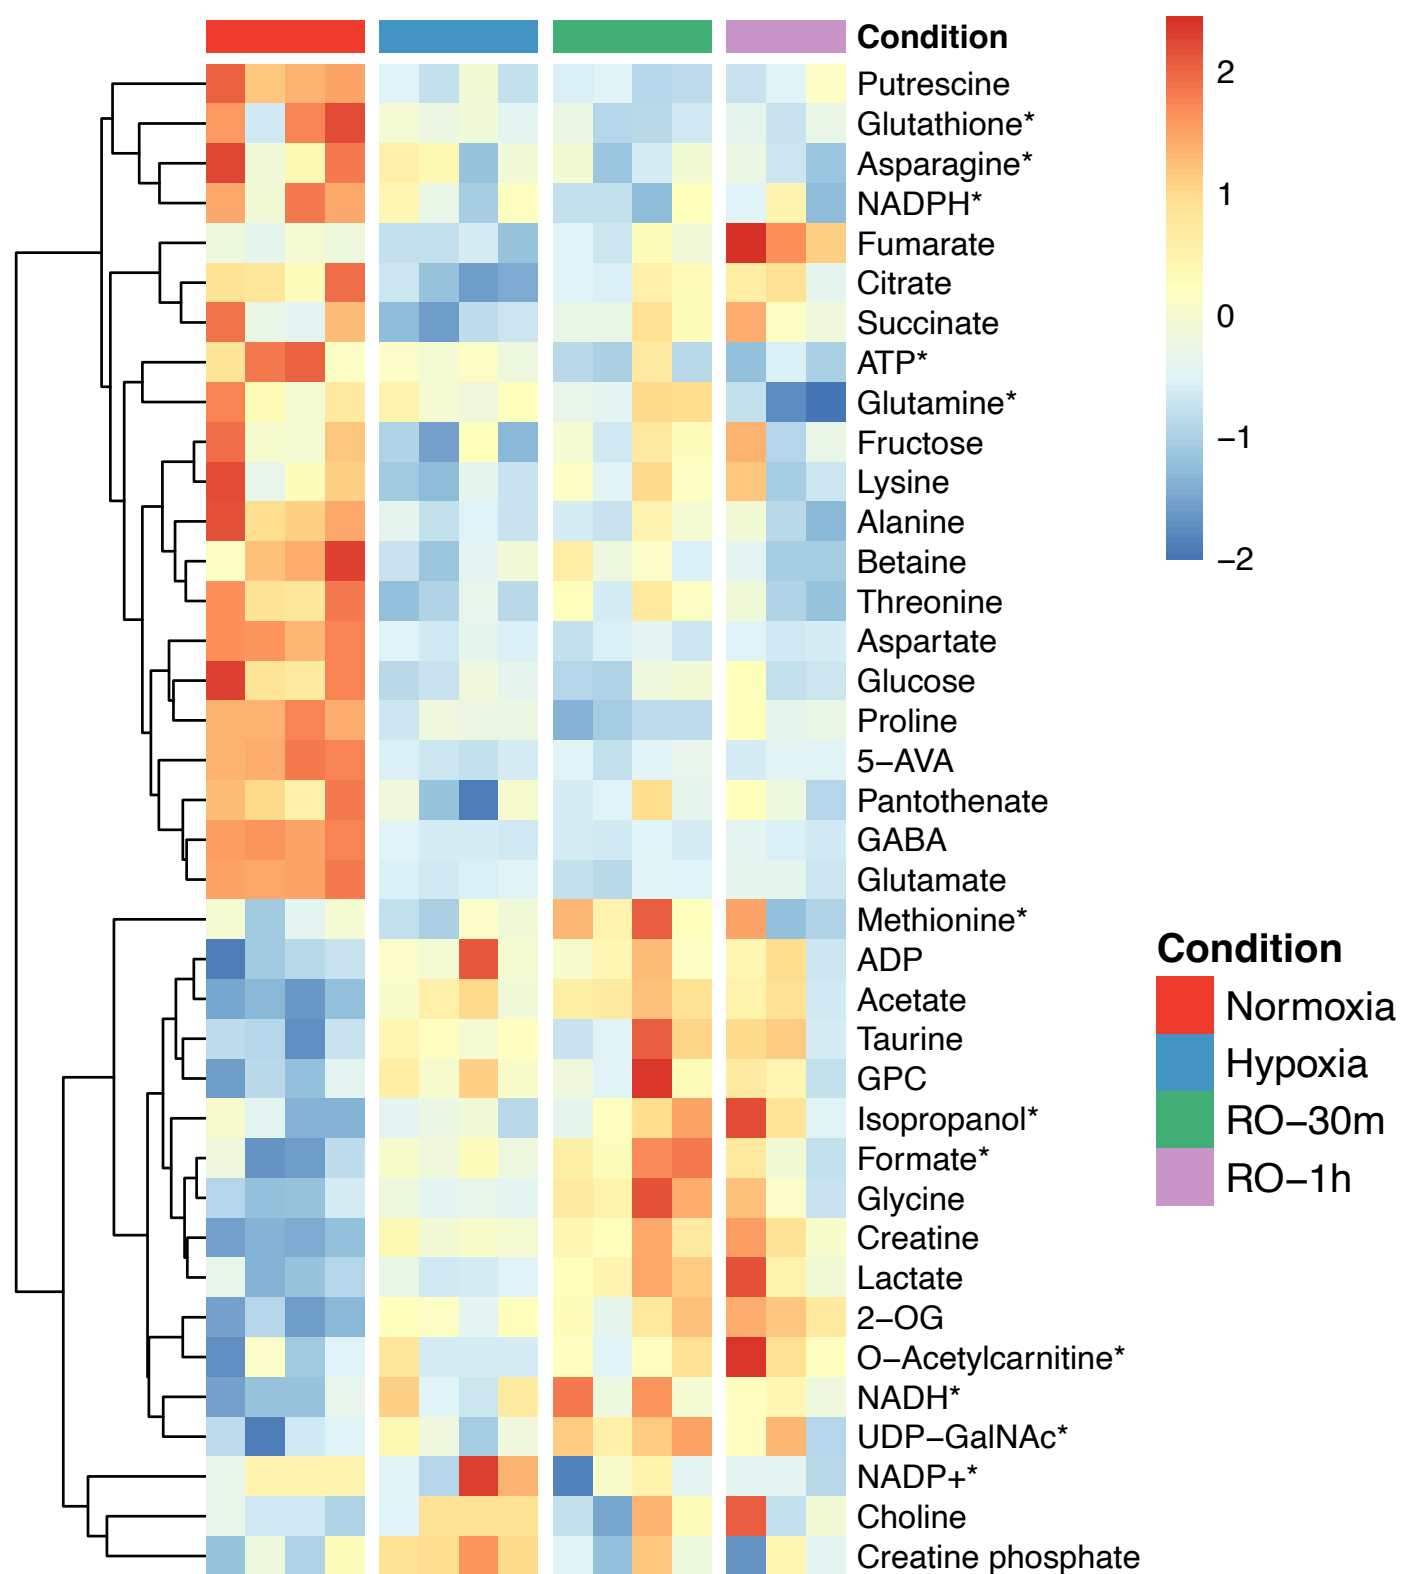

**Figure S1**

Supplement: s1 [file s1]

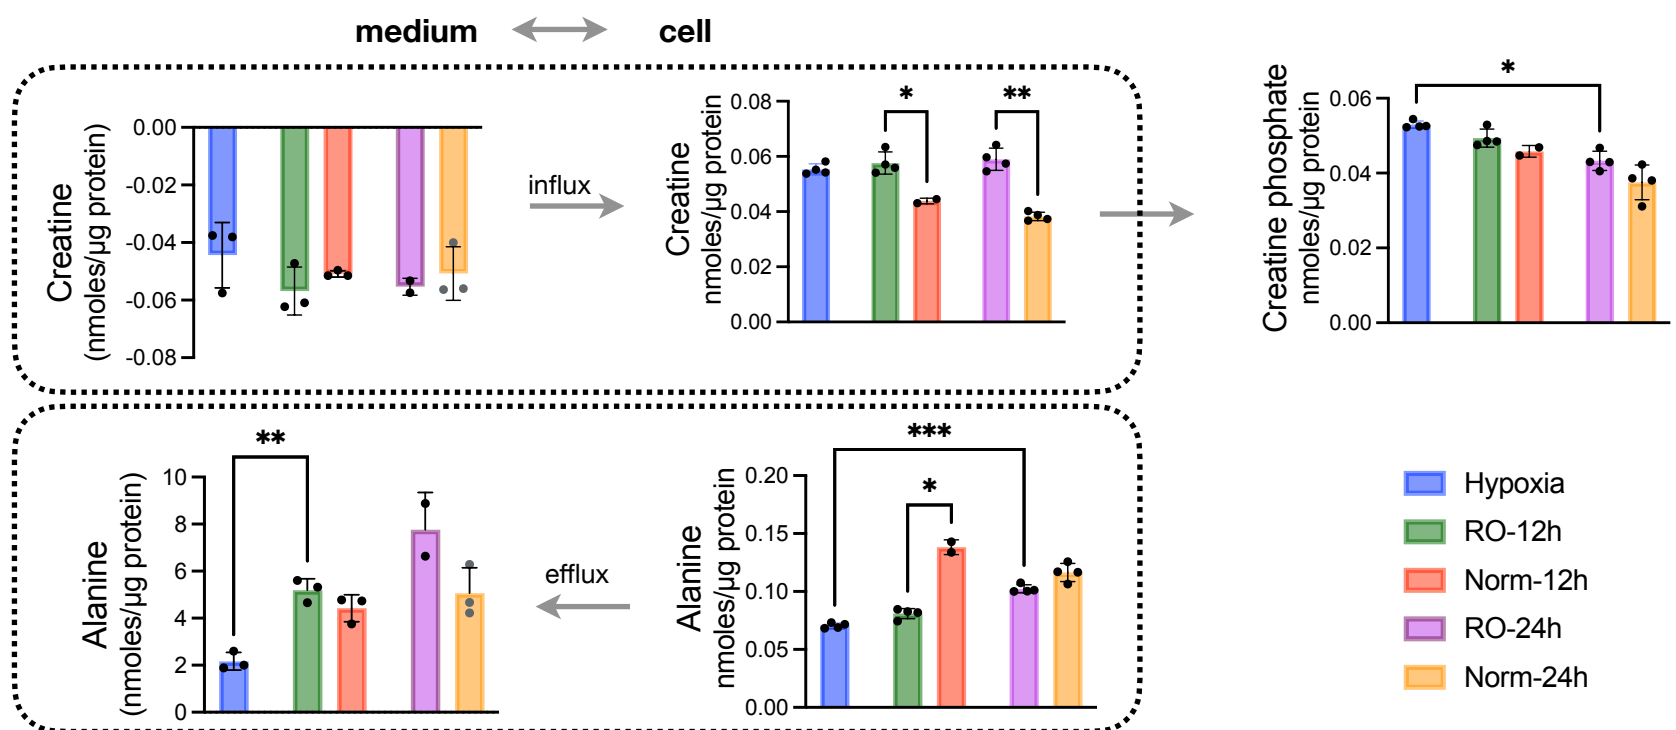

**Figure S3**

Supplement: s1 [file s1]

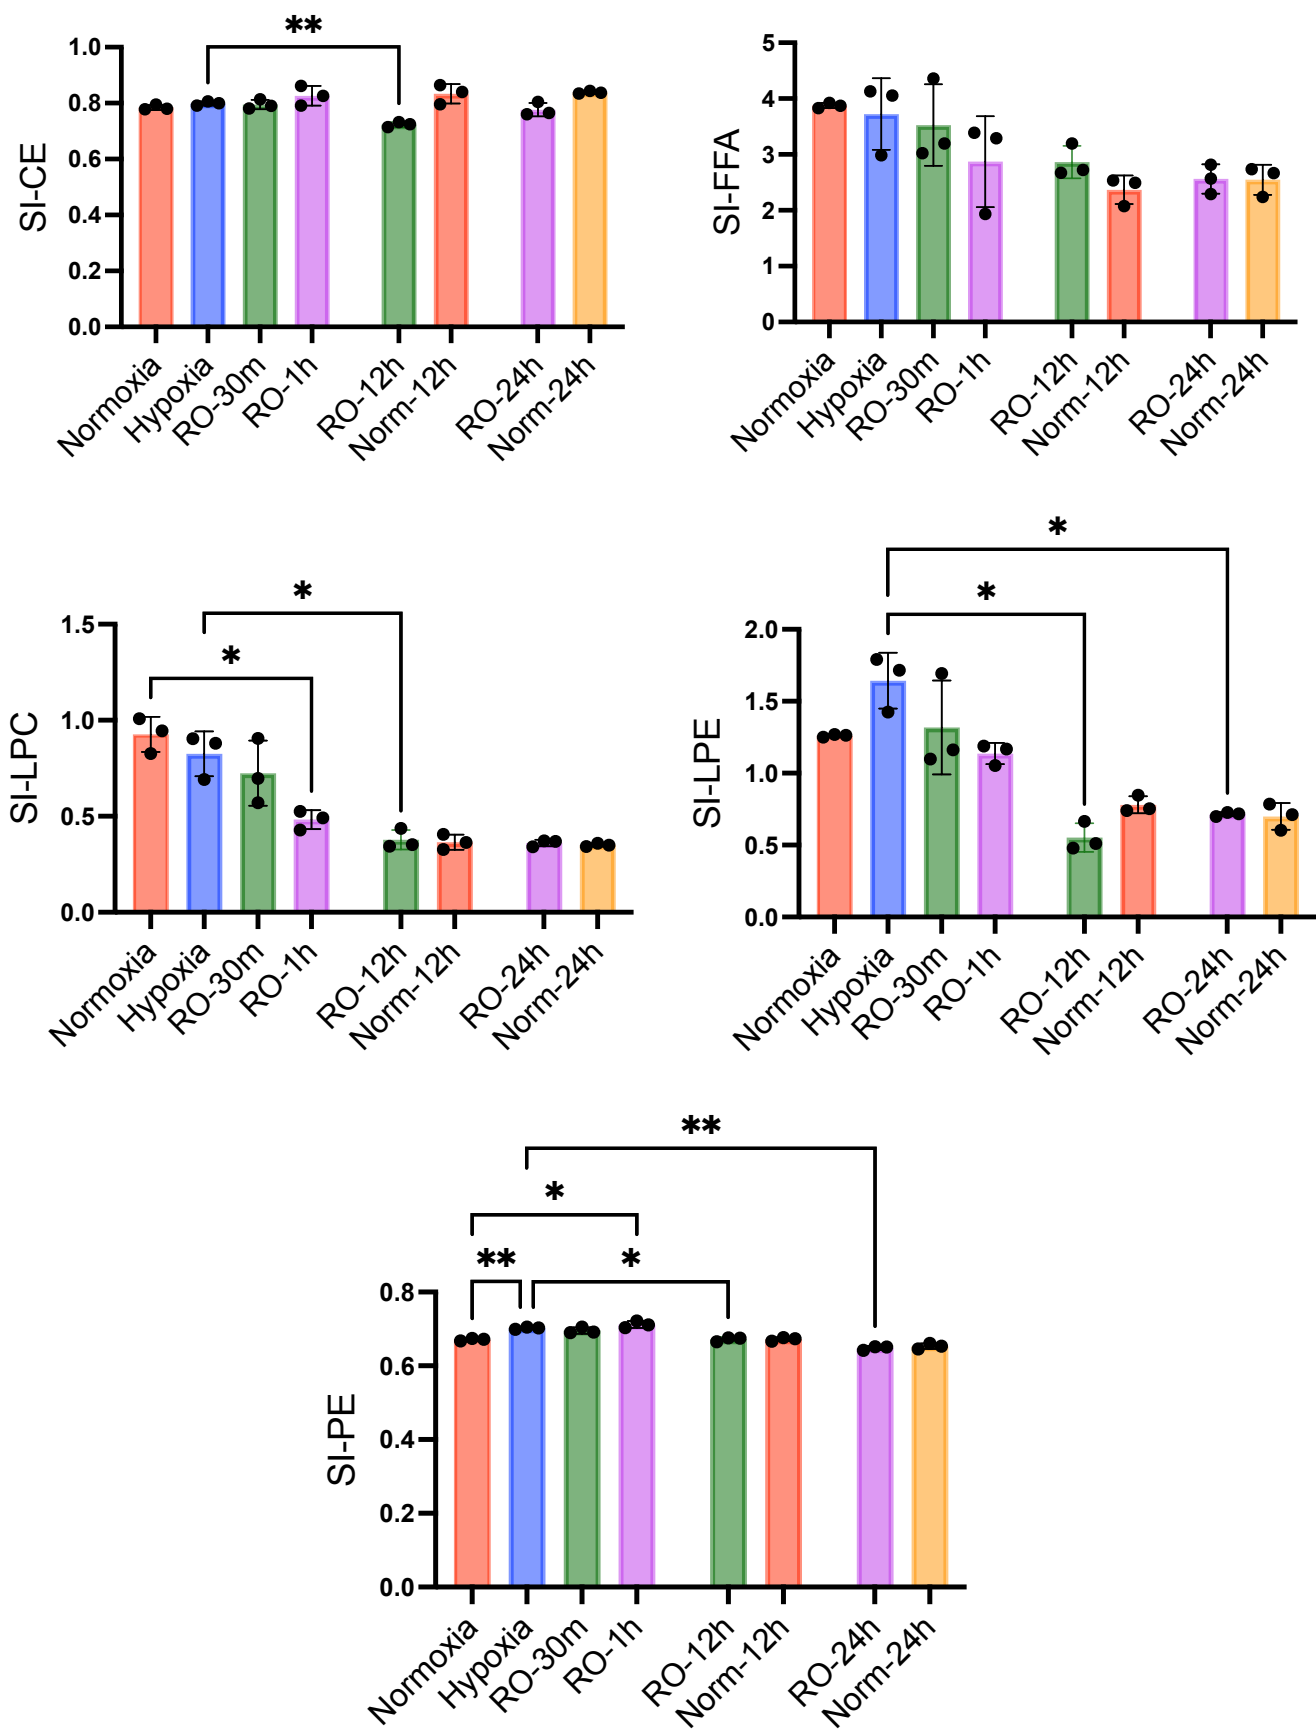

Figure S4

Supplement: s1 [file s1]
